# Supplementary material for: Two New Sesquiterpenoids and a New Shikimic Acid Metabolite from Mangrove Sediment-Derived Fungus Roussoella sp. SCSIO 41427
Source: MDPI journal article supplement (doi:10.3390/md22030103), 2024-02-23
Supplement: s1 [file s1]

# Supporting Information

## Two New Sesquiterpenoids and a New Shikimic Acid Metabolite from Mangrove Sediment-Derived Fungus

### *Roussoella* sp. SCSIO 41427

Zimin Xiao <sup>1,†</sup>, Jian Cai <sup>2,†</sup>, Ting Chen <sup>3</sup>, Yilin Wang <sup>3</sup>, Yixin Chen <sup>1</sup>, Yongyan Zhu <sup>1</sup>, Chunmei Chen <sup>2</sup>, Bin Yang <sup>2</sup>, Xuefeng Zhou <sup>2</sup> and Huaming Tao <sup>1,\*</sup>

<sup>1</sup> Guangdong Provincial Key Laboratory of Chinese Medicine Pharmaceutics, School of Traditional Chinese Medicine, Southern Medical University, Guangzhou 510515, China; 15917491112@163.com (Z.X.); 13676126834@163.com (Y.C.); yongyanzhu0521@163.com (Y.Z.)

<sup>2</sup> CAS Key Laboratory of Tropical Marine Bio-Resources and Ecology, Guangdong Key Laboratory of Marine Materia Medica, South China Sea Institute of Oceanology, Chinese Academy of Sciences, Guangzhou 510301, China; caijian19@mailsucas.ac.cn (J.C.); chenchunmei18@mailsucas.ac.cn (C.C.); yangbin@scsio.ac.cn (B.Y.); xfzhou@scsio.ac.cn (X.Z.)

<sup>3</sup> School of Stomatology, Southern Medical University, Guangzhou 510515, China; chent@smu.edu.cn (T.C.); FOURCWATER@outlook.com (Y.W.)

\* Correspondence: taohm@smu.edu.cn; Tel.: +86-020-61648770

† These authors contributed equally to this work.

## Table of Contents

The physicochemical data of the known compounds **4-17**.

**Figure S1.**  $^1\text{H}$  NMR spectrum of elgonene M (**1**) in  $\text{CDCl}_3$

**Figure S2.**  $^{13}\text{C}$  NMR spectrum of elgonene M (**1**) in  $\text{CDCl}_3$

**Figure S3.** DEPT135 spectrum of elgonene M (**1**) in  $\text{CDCl}_3$

**Figure S4.** HSQC spectrum of elgonene M (**1**) in  $\text{CDCl}_3$

**Figure S5.** HMBC spectrum of elgonene M (**1**) in  $\text{CDCl}_3$

**Figure S6.**  $^1\text{H}$ - $^1\text{H}$  COSY spectrum of elgonene M (**1**) in  $\text{CDCl}_3$

**Figure S7.** NOESY spectrum of elgonene M (**1**) in  $\text{CDCl}_3$

**Figure S8.** HRESIMS spectrum of elgonene M (**1**)

**Figure S9.** IR spectrum of elgonene M (**1**)

**Figure S10.** UV spectrum of elgonene M (**1**) in  $\text{CH}_3\text{OH}$

**Figure S11.** ECD spectrum of elgonene M (**1**) in  $\text{CH}_3\text{OH}$

**Figure S12.**  $^1\text{H}$  NMR spectrum of elgonene N (**2**) in  $\text{CDCl}_3$

**Figure S13.**  $^{13}\text{C}$  NMR spectrum of elgonene N (**2**) in  $\text{CDCl}_3$

**Figure S14.** DEPT135 spectrum of elgonene N (**2**) in  $\text{CDCl}_3$

**Figure S15.** HSQC spectrum of elgonene N (**2**) in  $\text{CDCl}_3$

**Figure S16.** HMBC spectrum of elgonene N (**2**) in  $\text{CDCl}_3$

**Figure S17.**  $^1\text{H}$ - $^1\text{H}$  COSY spectrum of elgonene N (**2**) in  $\text{CDCl}_3$

**Figure S18.** NOESY spectrum of elgonene N (**2**) in  $\text{CDCl}_3$

**Figure S19.** HRESIMS spectrum of elgonene N (**2**)

**Figure S20.** IR spectrum of elgonene N (**2**)

**Figure S21.** UV spectrum of elgonene N (**2**) in CH<sub>3</sub>OH

**Figure S22.** ECD spectrum of elgonene N (**2**) in CH<sub>3</sub>OH

**Figure S23.** <sup>1</sup>H NMR spectrum of compound **3** in CDCl<sub>3</sub>

**Figure S24.** <sup>13</sup>C NMR spectrum of compound **3** in CDCl<sub>3</sub>

**Figure S25.** HSQC spectrum of compound **3** in CD<sub>3</sub>OD

**Figure S26.** HMBC spectrum of compound **3** in CD<sub>3</sub>OD

**Figure S27.** <sup>1</sup>H-<sup>1</sup>H COSY spectrum of compound **3** in CD<sub>3</sub>OD

**Figure S28.** NOESY spectrum of compound **3** in CD<sub>3</sub>OD

**Figure S29.** HRESIMS spectrum of compound **3**

**Figure S30.** UV spectrum of compound **3** in CH<sub>3</sub>OH

**Figure S31.** ECD spectrum of compound **3** in CH<sub>3</sub>OH

**Figure S32.** HPLC spectrum of compounds **1** and **2**

**Table S1.** Energies of **1** and **2** at B3LYP/6–311g (d, p) level.

**Table S2.** Energies of **3** at B3LYP/6–311g (d, p) level.

**Compound 4:** White powder, HRESIMS  $m/z$  229.0469  $[M+Na]^+$  (calculated for  $C_{11}H_{10}NaO_4^+$ , 229.0471);  $^1H$  NMR (600 MHz,  $CDCl_3$ )  $\delta$  11.10 (1H, chelating phenol), 6.45 (1H, d,  $J = 2.3$  Hz, H-5), 6.29 (1H, d,  $J = 2.3$  Hz, H-7), 6.17 (1H, d,  $J = 1.3$  Hz, H-4), 3.86 (3H, s, OMe), 2.25 (3H, d,  $J = 1.0$  Hz, H-9);  $^{13}C$  NMR (150 MHz,  $CDCl_3$ )  $\delta$  166.9 (C-1), 166.5 (C-6), 163.8 (C-8), 154.4 (C-3), 139.6 (C-4a), 104.7 (C-4), 101.1 (C-5), 100.3 (C-7), 99.9 (C-8a), 55.8 (C-OMe), 19.6 (C-9).

**Compound 5:** Pale yellow powder, HRESIMS  $m/z$  273.0739  $[M+Na]^+$  (calculated for  $C_{13}H_{14}NaO_5^+$ , 273.0733);  $^1H$  NMR (600 MHz,  $CD_3OD$ )  $\delta$  6.48 – 6.42 (3H, m, H-4, H-7, H-5), 4.21 – 4.12 (1H, m, H-12), 3.88 (3H, OMe), 2.66 – 2.56 (2H, m, H-11), 1.27 (3H, d,  $J = 6.3$  Hz, H-13).  $^{13}C$  NMR (150 MHz,  $CD_3OD$ )  $\delta$  168.5 (C-1), 167.8 (C-8), 164.6 (C-6), 156.5 (C-3), 141.1 (C-10), 107.1 (C-4), 102.1 (C-7), 101.5 (C-5), 100.9 (C-9), 66.2 (C-12), 56.3 (C-OMe), 43.8 (C-11), 23.4 (C-13).

**Compound 6:** Red-brown gel-like substance, HRESIMS  $m/z$  275.0895  $[M+Na]^+$  (calculated for  $C_{13}H_{16}NaO_5^+$ , 275.0890);  $^1H$  NMR (600 MHz,  $CDCl_3$ )  $\delta$  7.85 (1H, -OH), 6.43 (1H, s, H-7), 4.21 (1H, q,  $J = 6.5$  Hz, H-3), 3.88 (3H, s, H-12), 2.11 (3H, s, H-11), 1.80 (3H, s, H-10), 0.93 (3H, d,  $J = 6.4$  Hz, H-9).  $^{13}C$  NMR (150 MHz,  $CDCl_3$ )  $\delta$  171.7 (C-1), 165.5 (C-6), 156.7 (C-8), 150.0 (C-4a), 112.4 (C-5), 103.1 (C-8a), 98.4 (C-7), 92.1 (C-4), 71.1 (C-3), 56.4 (C-12), 21.4 (C-10), 18.0 (C-9), 11.4 (C-11).

**Compound 7:** White powder, HRESIMS  $m/z$  257.0789  $[M+Na]^+$  (calculated for  $C_{13}H_{14}NaO_4^+$ , 257.0784);  $^1H$  NMR (600 MHz,  $CDCl_3$ )  $\delta$  11.02 (1H, s, -OH), 6.38 (1H, s, H-7), 4.79 (1H, d,  $J = 1.9$  Hz, H-9b), 4.56 (1H, d,  $J = 1.9$  Hz, H-9a), 3.86 (3H, s, H-12), 3.81 (1H, q,  $J = 7.1$  Hz, H-4), 2.07 (3H, s, H-11), 1.37 (3H, d,  $J = 7.1$  Hz, H-10).  $^{13}C$  NMR (150 MHz,  $CDCl_3$ )  $\delta$  167.1 (C-1), 164.9 (C-6), 163.1 (C-8), 157.2 (C-3), 142.2 (C-4a), 114.1 (C-5), 98.7 (C-8a), 97.6 (C-7), 96.0 (C-8), 56.0 (C-12), 35.0 (C-4), 22.4 (C-10), 10.1 (C-11).

**Compound 8:** Red-brown crystals,  $^1H$  NMR (600 MHz,  $CD_3OD$ )  $\delta$  6.36 (1H, s, H-4), 6.31 (1H, d,  $J = 2.1$  Hz, H-7), 6.30 (1H, d,  $J = 2.2$  Hz, H-5), 4.18 – 4.12 (1H, m, H-2'), 2.64 – 2.54 (2H, m, H-1'), 1.25 (3H, d,  $J = 6.2$  Hz, H-3').  $^{13}C$  NMR (150 MHz,  $CD_3OD$ )  $\delta$  167.9 (C-1), 167.3 (C-8), 164.9 (C-6), 156.2 (C-3), 141.3 (C-10), 107.0 (C-4), 103.7 (C-7), 102.6 (C-5), 99.8 (C-9), 66.2 (C-2'), 43.8 (C-1'), 23.3 (C-3').

**Compound 9:** Brown powder,  $^1H$  NMR (600 MHz,  $CD_3OD$ )  $\delta$  6.29 (2H, t,  $J = 2.3$  Hz, H-4, H-5), 6.26 (1H, d,  $J = 2.0$  Hz, H-7), 2.22 (3H, s, H-9).  $^{13}C$  NMR (150 MHz,  $CD_3OD$ )  $\delta$  167.8 (C-6), 167.4 (C-1), 164.9 (C-8), 155.5 (C-3), 141.5 (C-4a), 105.5 (C-5), 103.4 (C-7), 102.5 (C-4), 99.5 (C-8a), 19.2 (C-9).

Compound **10**: White powder,  $^1\text{H}$  NMR (600 MHz,  $\text{CD}_3\text{OD}$ )  $\delta$  6.52 (1H, s, H-7), 5.09 (1H, d,  $J = 1.7$  Hz, H<sub>a</sub>-9), 4.88 (1H, d,  $J = 1.7$  Hz, H<sub>b</sub>-9), 3.89 (3H, s, H-12), 2.40 (3H, s, H-11), 1.66 (3H, s, H-10).  $^{13}\text{C}$  NMR ( $\text{CD}_3\text{OD}$ , 150 MHz)  $\delta$  168.1 (C-1), 167.3 (C-6), 164.4 (C-8), 162.9 (C-3), 144.8 (C-4a), 117.7 (C-5), 99.3 (C-7), 99.1 (C-8a), 95.4 (C-9), 72.5 (C-4), 56.6 (C-12), 29.5 (C-10), 12.2 (C-11).

Compound **11**: Colorless gel-like substance,  $[\alpha]_D^{25} +35.2$  (c 0.1,  $\text{CH}_3\text{OH}$ ); HRESIMS  $m/z$  230.0787  $[\text{M}+\text{Na}]^+$  (calculated for  $\text{C}_{11}\text{H}_{13}\text{NNaO}_3^+$ , 230.0788);  $^1\text{H}$  NMR (600 MHz,  $\text{CD}_3\text{OD}$ )  $\delta$  7.29 – 7.25 (2H, m), 7.24 – 7.18 (3H, m), 4.64 (1H, dd,  $J = 9.1, 5.0$  Hz, H-2), 3.20 (1H, dd,  $J = 13.9, 5.0$  Hz, H-3b), 2.94 (1H, dd,  $J = 13.9, 9.0$  Hz, H-3a), 1.90 (3H, s, H-12).  $^{13}\text{C}$  NMR (150 MHz,  $\text{CD}_3\text{OD}$ )  $\delta$  175.1 (C-1), 173.1 (C-11), 138.6 (C-4), 130.2 (C-6, C-8), 129.4 (C-5, C-9), 127.8 (C-7), 55.3 (C-2), 38.5 (C-3), 22.3 (C-12).

Compound **12**: Pale yellow crystals,  $^1\text{H}$  NMR (600 MHz,  $\text{CD}_3\text{OD}$ )  $\delta$  8.06 (1H, d,  $J = 8.1$  Hz, H-4), 7.93 (1H, s, H-2), 7.46 – 7.39 (1H, m, H-7), 7.21 – 7.11 (2H, m, H-5, H-6).  $^{13}\text{C}$  NMR (150 MHz,  $\text{CD}_3\text{OD}$ )  $\delta$  169.5 (C-1), 138.2 (C-7a), 133.3 (C-2), 127.6 (C-3), 123.6 (C-5), 122.3 (C-4), 122.1 (C-6), 112.9 (C-7), 109.0 (C-3a).

Compound **13**: White powder,  $^1\text{H}$  NMR (600 MHz,  $\text{DMSO}-d_6$ )  $\delta$  10.93 (2H, s, -OH), 7.39 (1H, d,  $J = 7.6$  Hz, H-6), 5.44 (1H, d,  $J = 7.6$  Hz, H-5).  $^{13}\text{C}$  NMR (150 MHz,  $\text{DMSO}-d_6$ )  $\delta$  164.3 (C-4), 151.5 (C-2), 142.3 (C-6), 100.2 (C-5).

Compound **14**: Pale brown oil,  $^1\text{H}$  NMR (600 MHz,  $\text{DMSO}-d_6$ )  $\delta$  7.57 (1H, t,  $J = 7.9$  Hz, H-7), 7.16 (1H, d,  $J = 7.9$  Hz, H-6), 6.85 (1H, d,  $J = 8.3$  Hz, H-8), 4.84 (1H, dt,  $J = 11.0, 4.5$  Hz, H-4), 4.40 (1H, dd,  $J = 13.4, 4.6$  Hz, H-3), 2.45 (1H, dt,  $J = 11.5, 4.8$  Hz, H-2b), 1.90 (1H, dt,  $J = 13.4, 11.6$  Hz, H-2a).  $^{13}\text{C}$  NMR (150 MHz,  $\text{DMSO}-d_6$ )  $\delta$  206.0 (C-1), 161.4 (C-9), 150.1 (C-5), 136.6 (C-7), 116.6 (C-6), 115.5 (C-8), 113.9 (C-10), 70.4 (C-4), 65.2 (C-3), 42.2 (C-2).

Compound **15**: Colorless crystals,  $^1\text{H}$  NMR (600 MHz,  $\text{CD}_3\text{OD}$ )  $\delta$  6.67 (1H, tt,  $J = 2.6, 1.2$  Hz, H-2), 4.32 (1H, tt,  $J = 3.9, 2.2$  Hz, H-4), 3.95 (1H, dt,  $J = 3.7, 1.7$  Hz, H-3), 3.83 (1H, ddd,  $J = 9.5, 5.9, 1.8$  Hz, H-5), 3.74 (3H, -OMe), 2.53 (1H, ddt,  $J = 17.3, 6.0, 1.6$  Hz, H-6b), 2.38 (1H, dddd,  $J = 17.2, 9.5, 3.5, 2.6$  Hz, H-6a).  $^{13}\text{C}$  NMR (150 MHz,  $\text{CD}_3\text{OD}$ )  $\delta$  168.5 (C-7), 140.2 (C-2), 129.8 (C-1), 72.3 (C-4), 69.7 (C-5), 69.4 (C-3), 52.4 (C-OMe), 29.7 (C-6).

Compound **16**: Brown oil,  $^1\text{H}$  NMR (600 MHz,  $\text{CDCl}_3$ )  $\delta$  7.07 (2H, d,  $J = 8.4$  Hz, H-3', H-5'), 6.77 (2H, d,  $J = 8.5$  Hz, H-2', H-6'), 5.66 (1H, s, -OH), 4.24 (2H, t,  $J = 7.1$  Hz, H-3), 2.86 (2H, t,  $J = 7.1$  Hz, H-2), 2.05 (3H, s, H-7').  $^{13}\text{C}$  NMR (150 MHz,  $\text{CDCl}_3$ )  $\delta$  171.8 (C-1), 154.6 (C-1'), 130.1 (C-3', C-5'), 129.7 (C-4'), 115.5 (C-2', C-6'), 65.5 (C-3), 34.3 (C-2), 21.1 (C-7').

Compound **17**: Brown powder,  $^1\text{H}$  NMR (600 MHz,  $\text{CD}_3\text{OD}$ )  $\delta$  7.42 (2H, d,  $J = 7.3$  Hz, H-2, H-6), 6.80 (1H, d,  $J = 8.5$  Hz, H-5), 3.84 (s, 3H).  $^{13}\text{C}$  NMR (150 MHz,  $\text{CD}_3\text{OD}$ )  $\delta$  168.9

(-COOH), 151.7 (C-3), 146.2 (C-4), 123.6 (C-6), 122.6 (C-1), 117.4 (C-5), 115.9 (C-2), 52.2 (C-OMe).

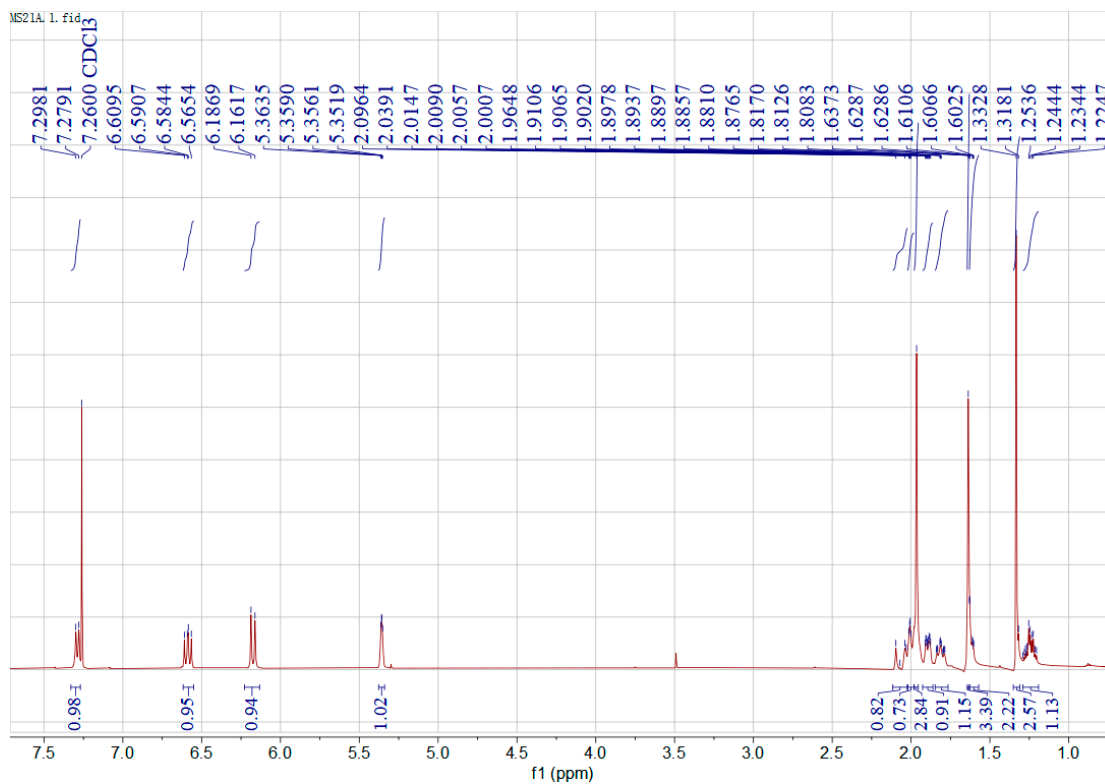

**Figure S1.** <sup>1</sup>H NMR spectrum of elgonene M (**1**) in CDCl<sub>3</sub>

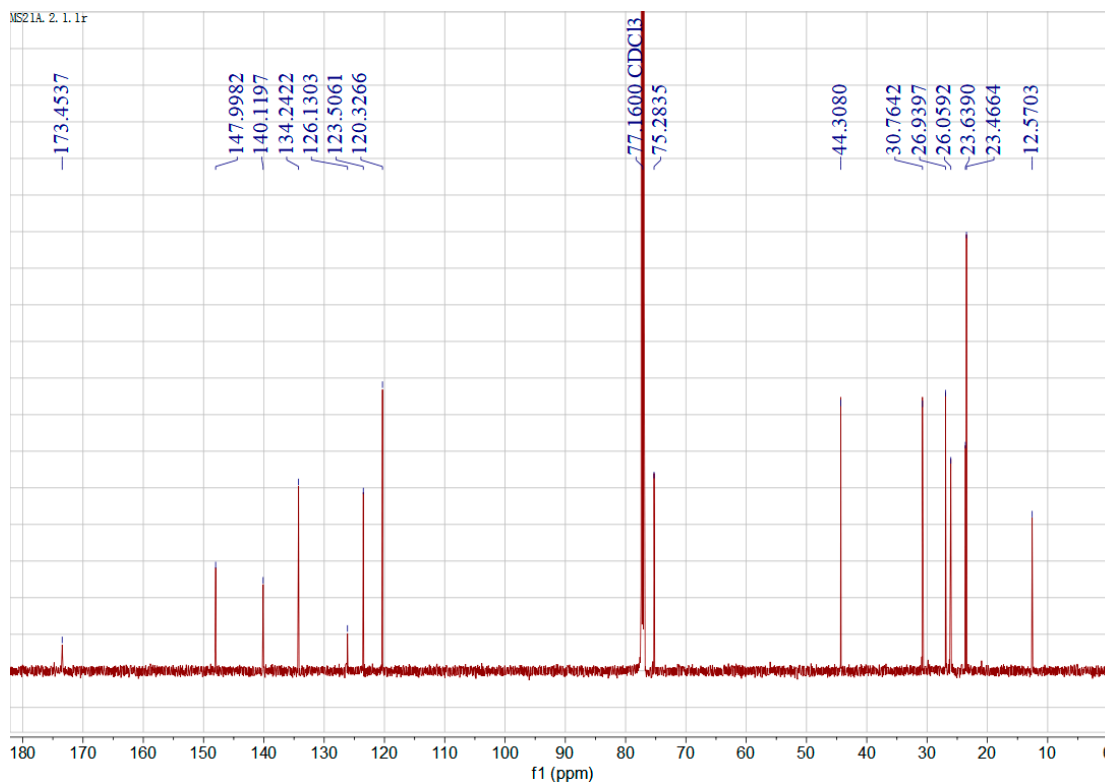

**Figure S2.** <sup>13</sup>C NMR spectrum of elgonene M (**1**) in CDCl<sub>3</sub>

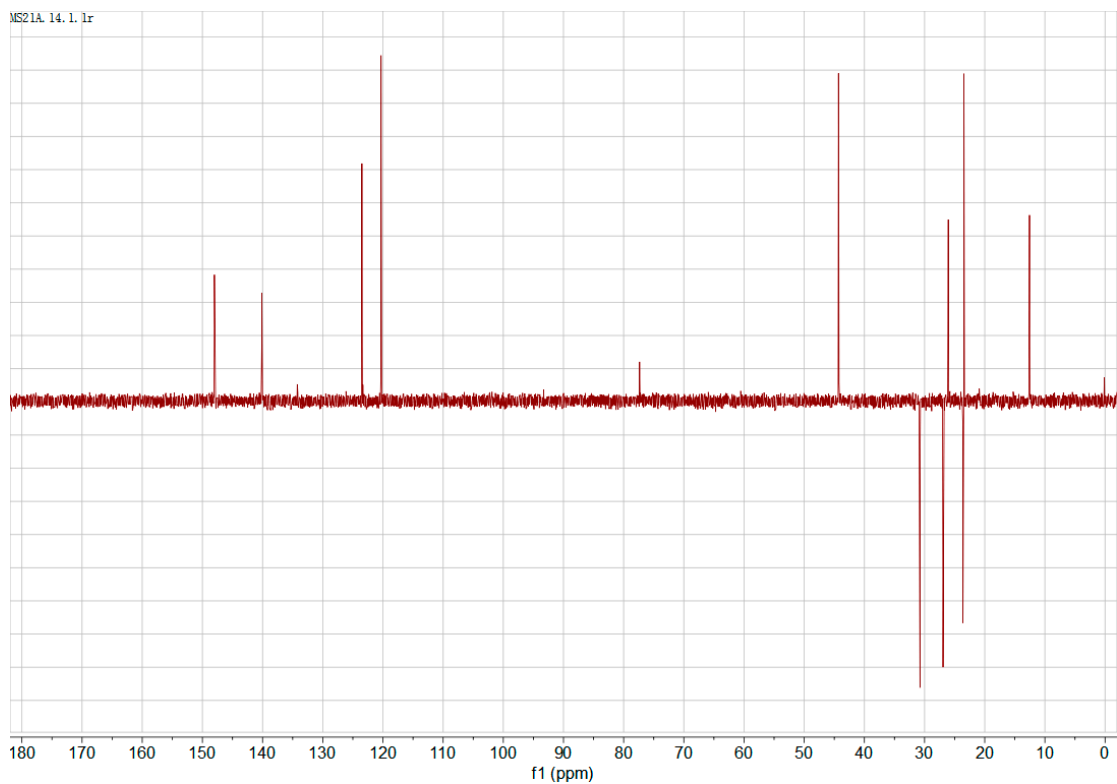

**Figure S3.** DEPT135 spectrum of elgonene M (**1**) in CDCl<sub>3</sub>

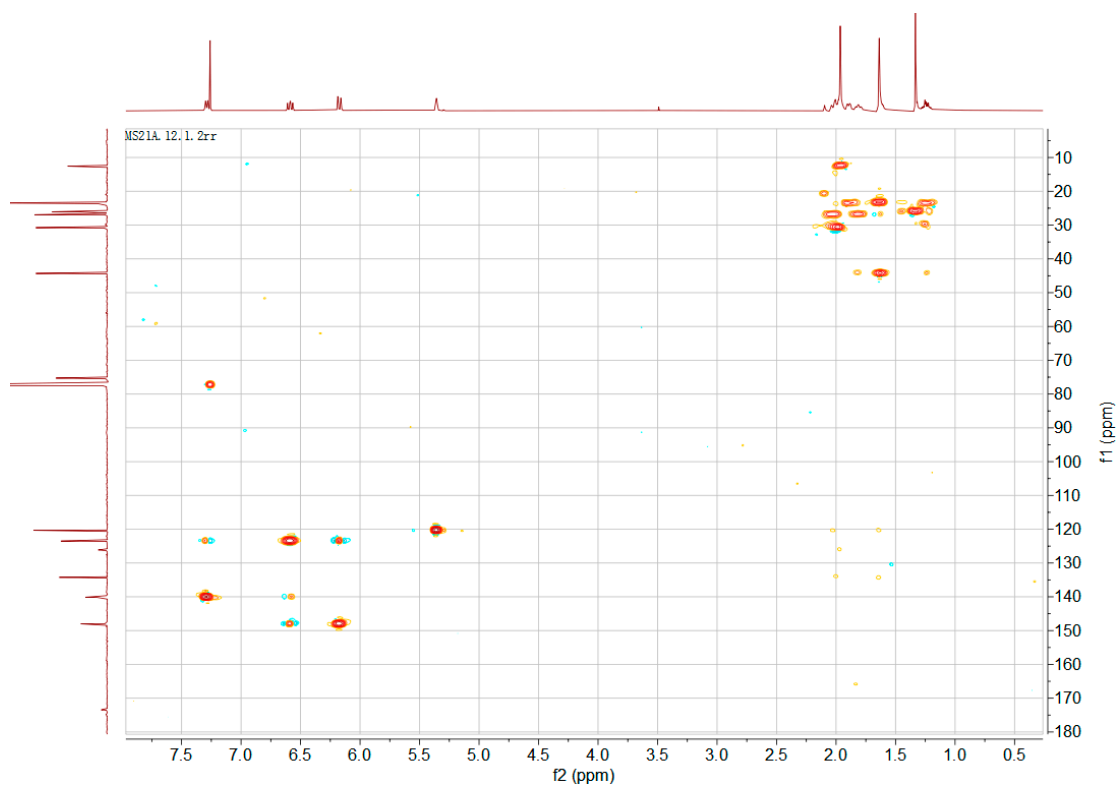

**Figure S4.** HSQC spectrum of elgonene M (**1**) in CDCl<sub>3</sub>



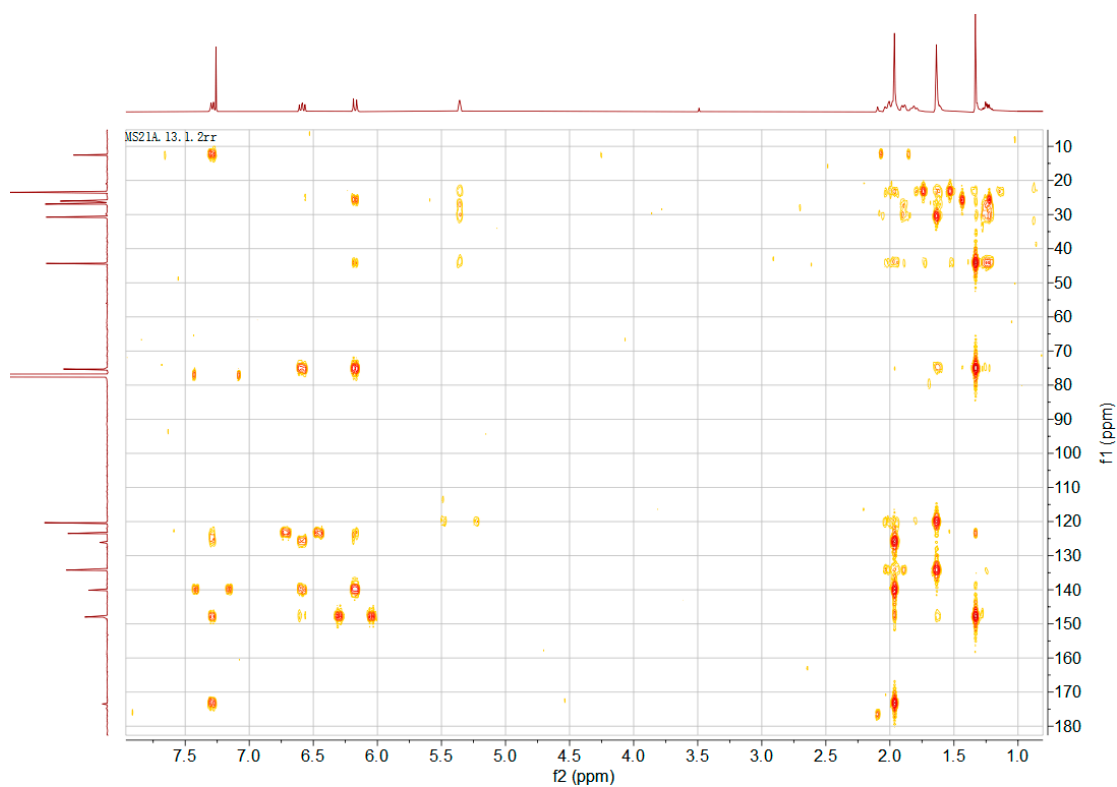

**Figure S5.** HMBC spectrum of elgonene M (**1**) in  $\text{CDCl}_3$

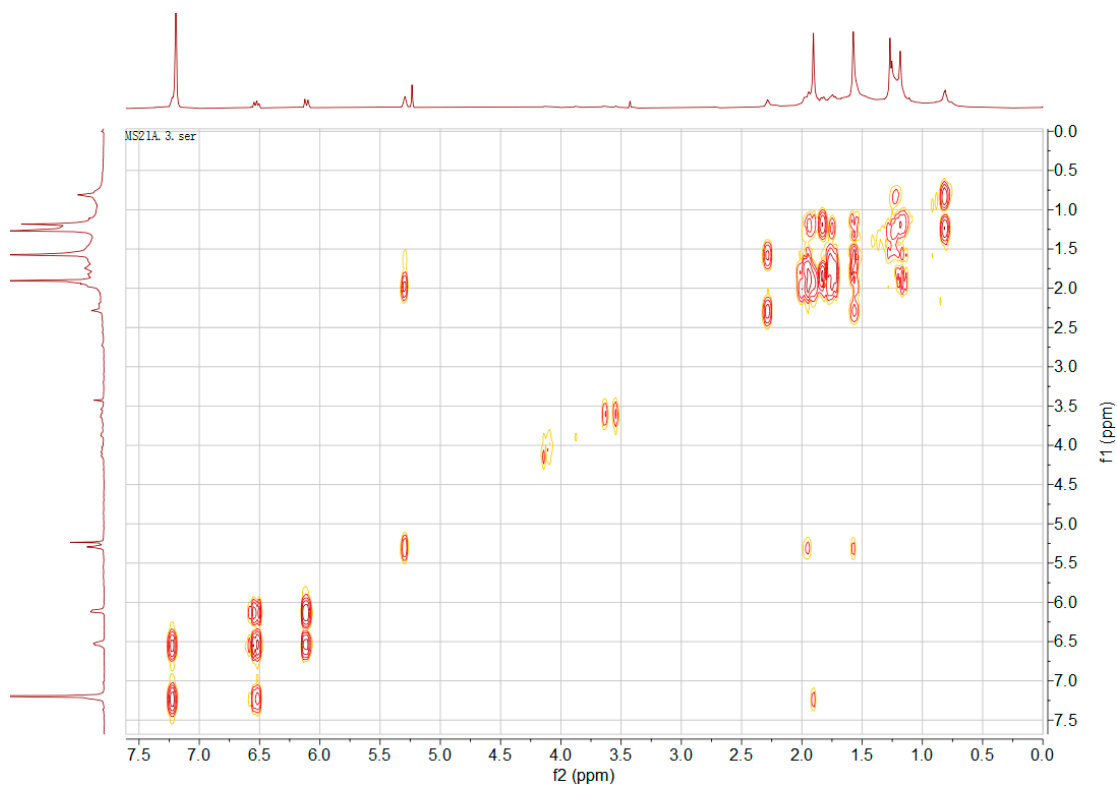

**Figure S6.**  $^1\text{H}$ - $^1\text{H}$  COSY spectrum of elgonene M (**1**) in  $\text{CDCl}_3$

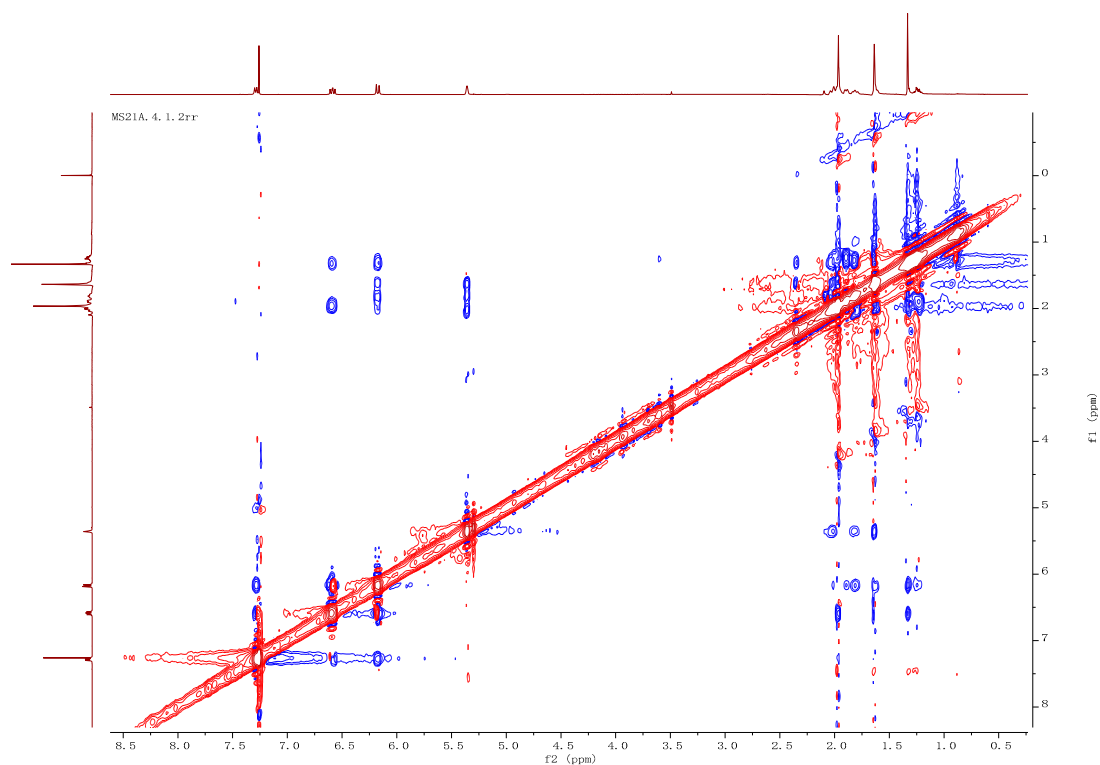

**Figure S7.** NOESY spectrum of elgonene M (**1**) in  $\text{CDCl}_3$

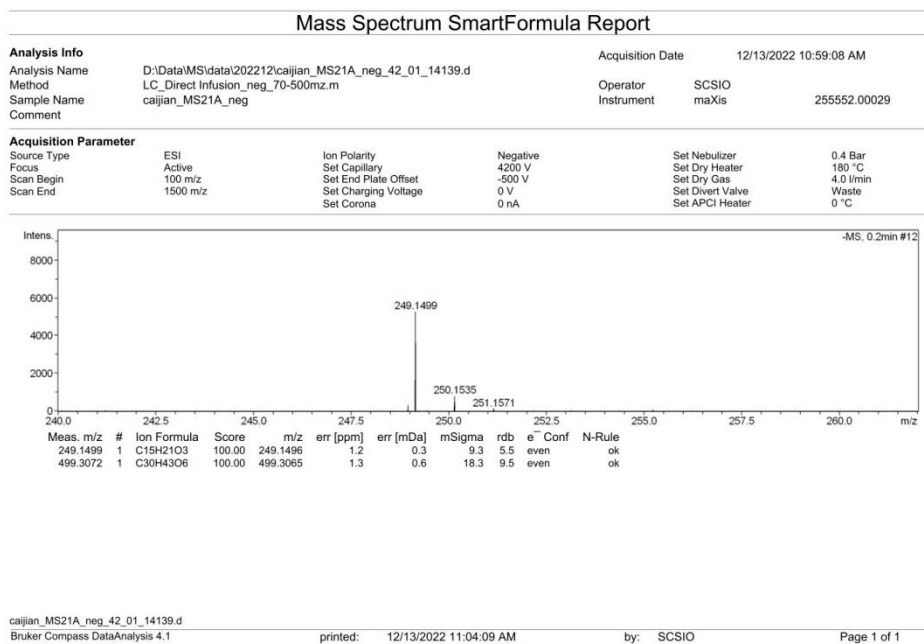

**Figure S8.** HRESIMS spectrum of elgonene M (**1**)

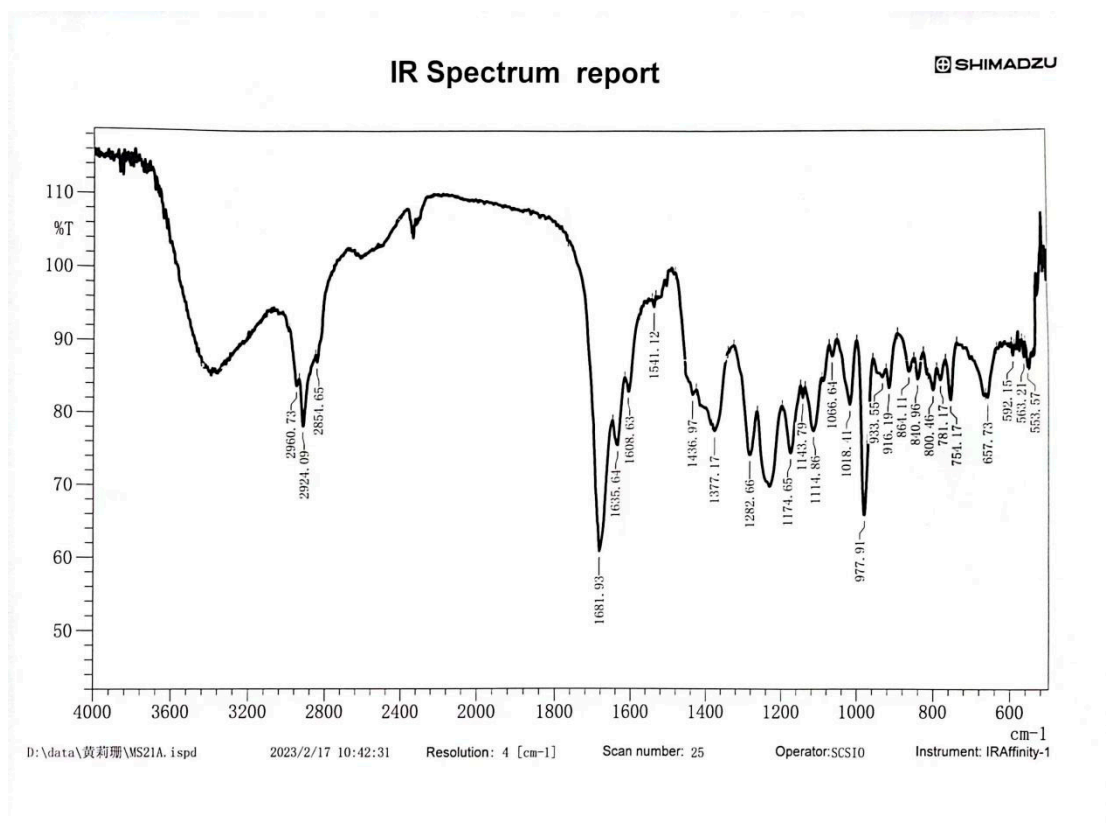

**Figure S9.** IR spectrum of elgonene M (1)

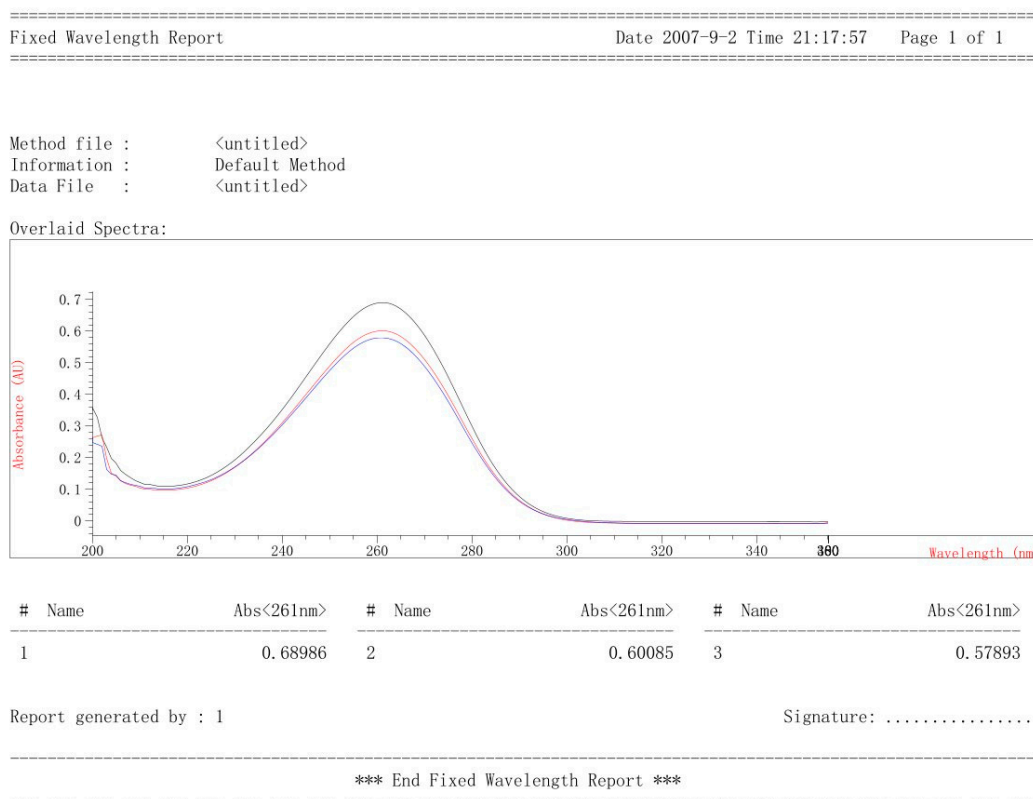

**Figure S10.** UV spectrum of elgonene M (1) in MeOH

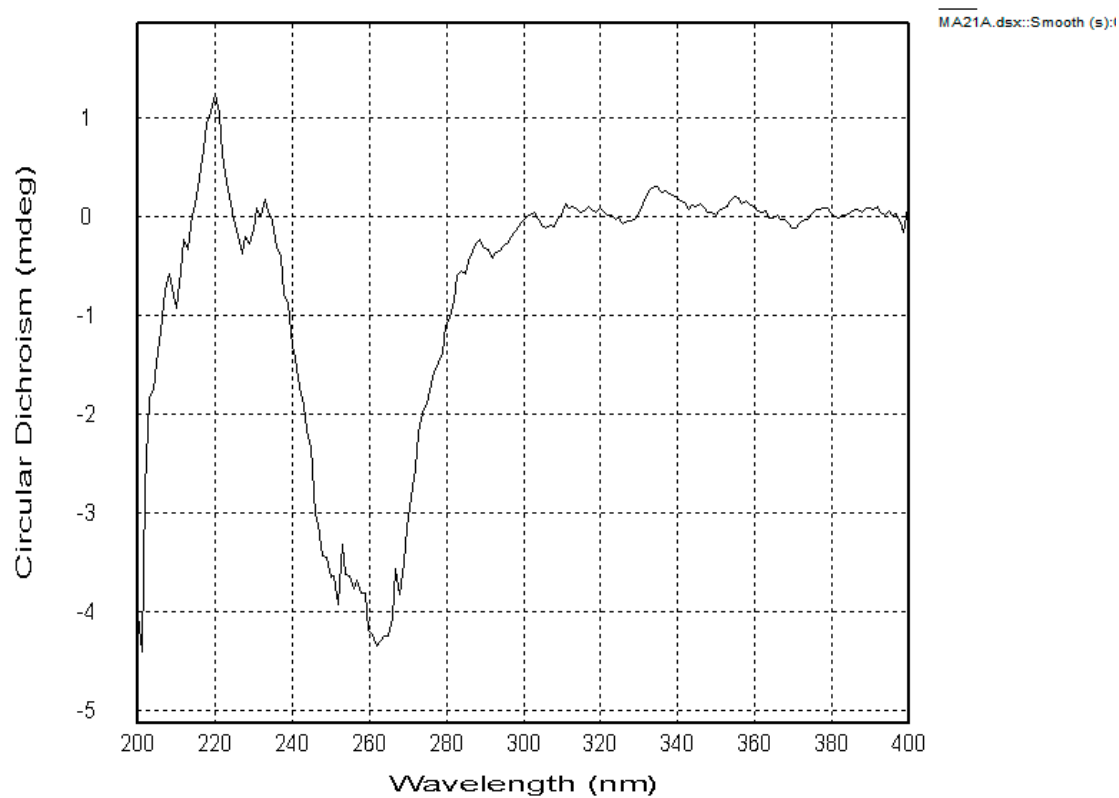

**Figure S11.** ECD spectrum of elgonene M (**1**) in MeOH

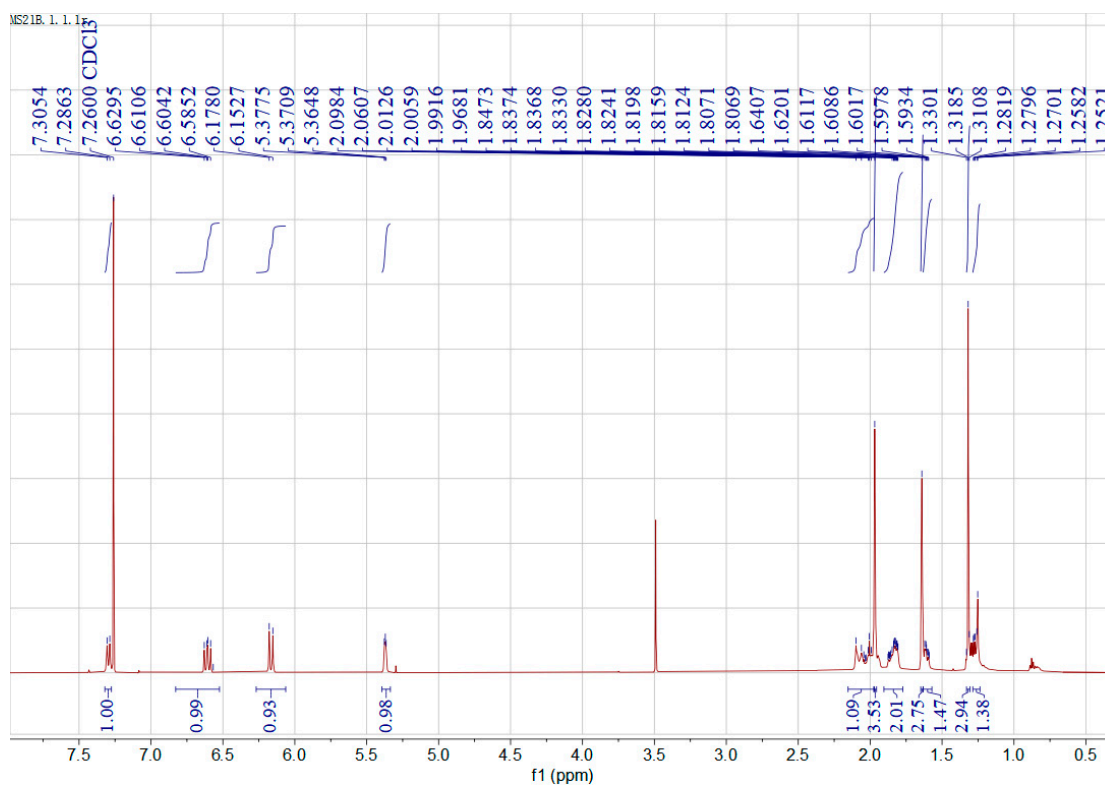

**Figure S12.**  $^1\text{H}$  NMR spectrum of elgonene N (**2**) in  $\text{CDCl}_3$

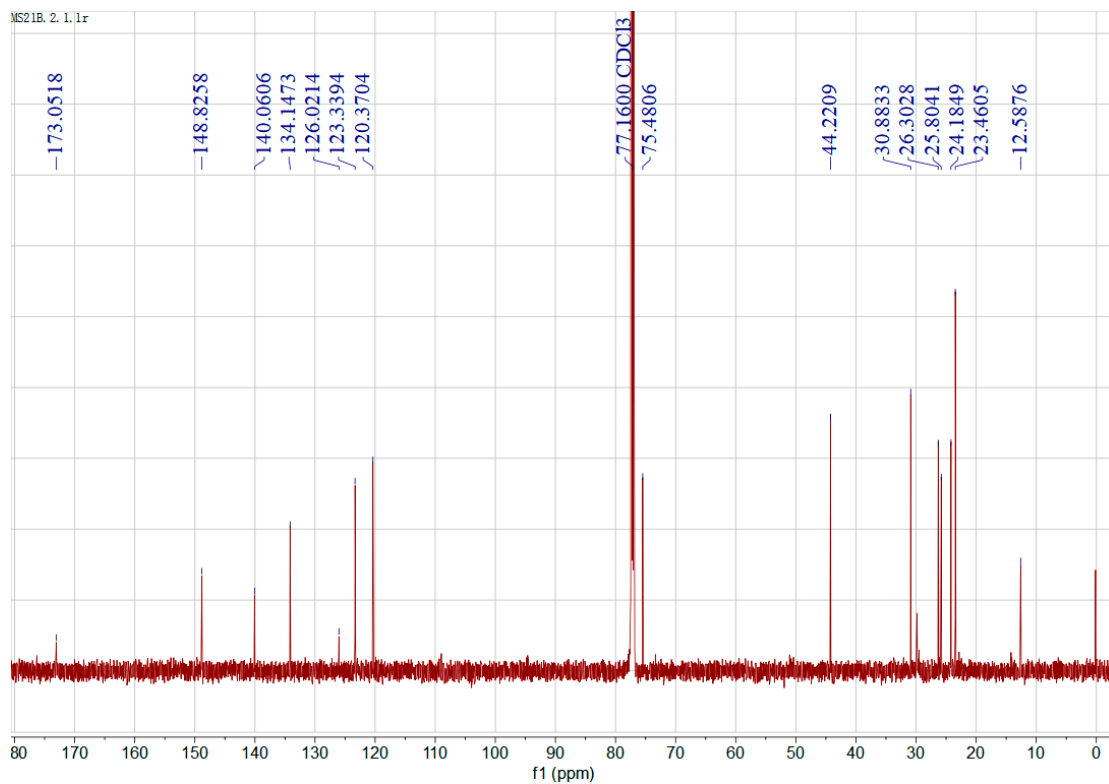

**Figure S13.**  $^{13}\text{C}$  NMR spectrum of elgonene N (**2**) in  $\text{CDCl}_3$

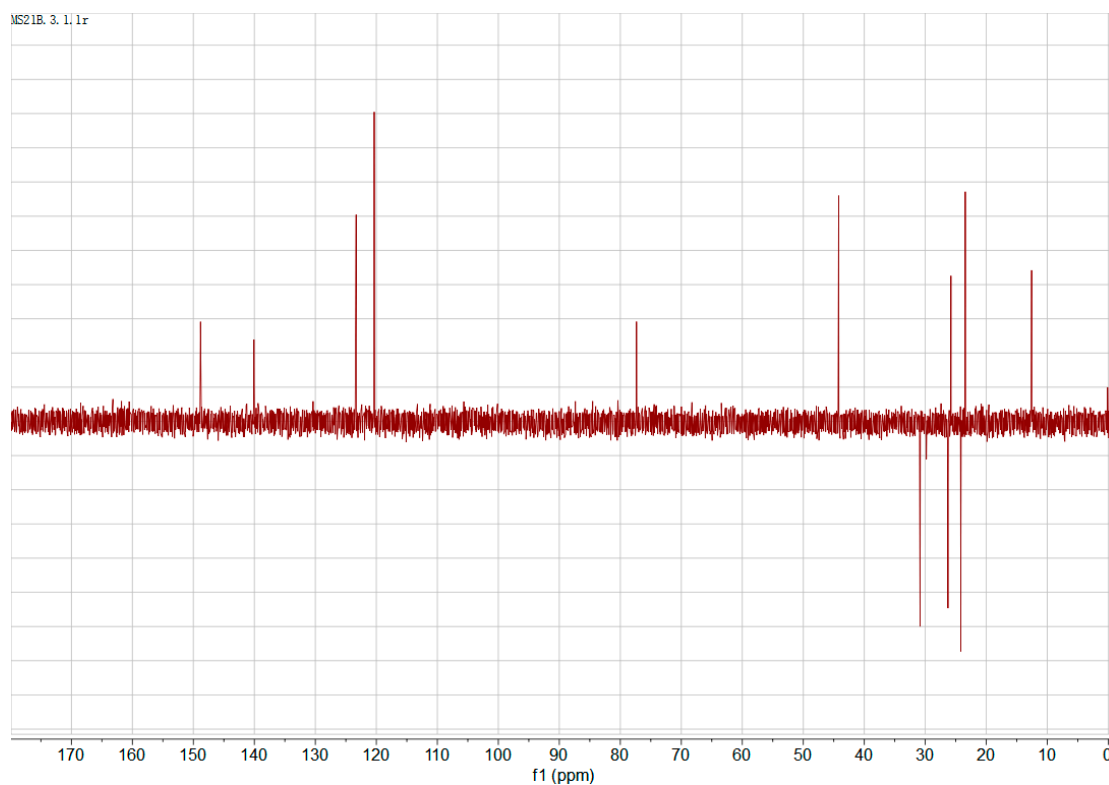

**Figure S14.** DEPT135 spectrum of elgonene N (**2**) in  $\text{CDCl}_3$

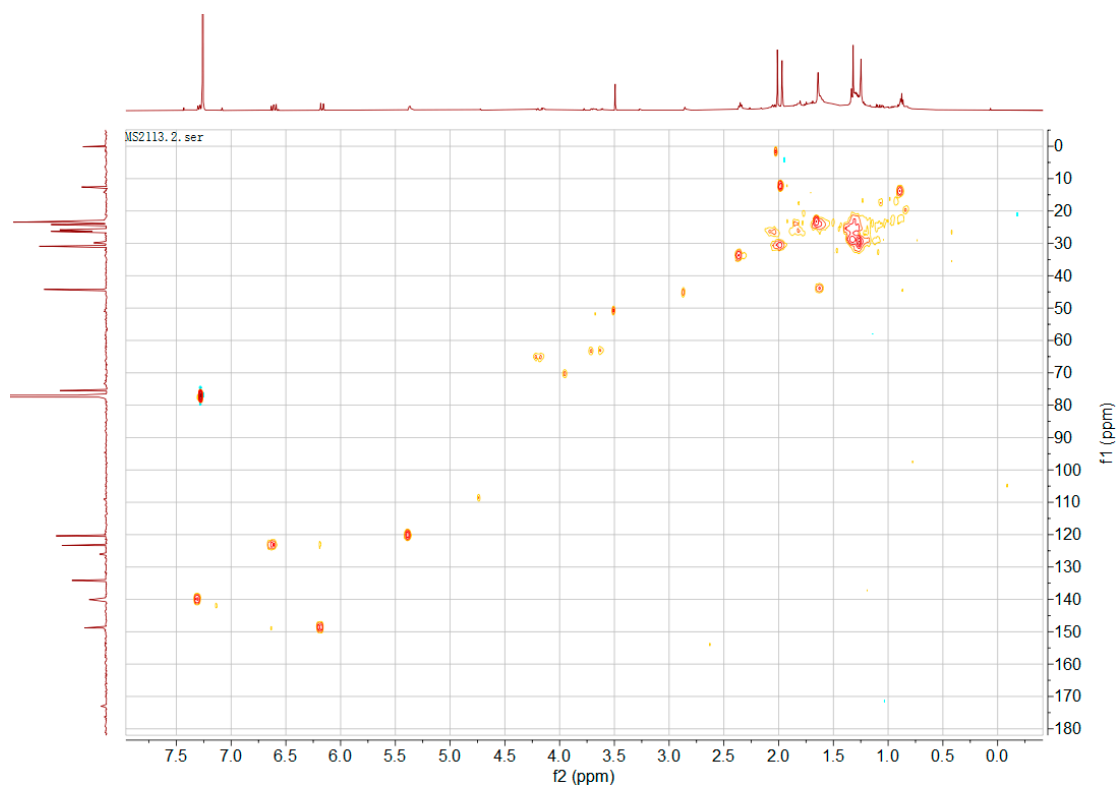

**Figure S15.** HSQC spectrum of elgonene N (**2**) in  $\text{CDCl}_3$

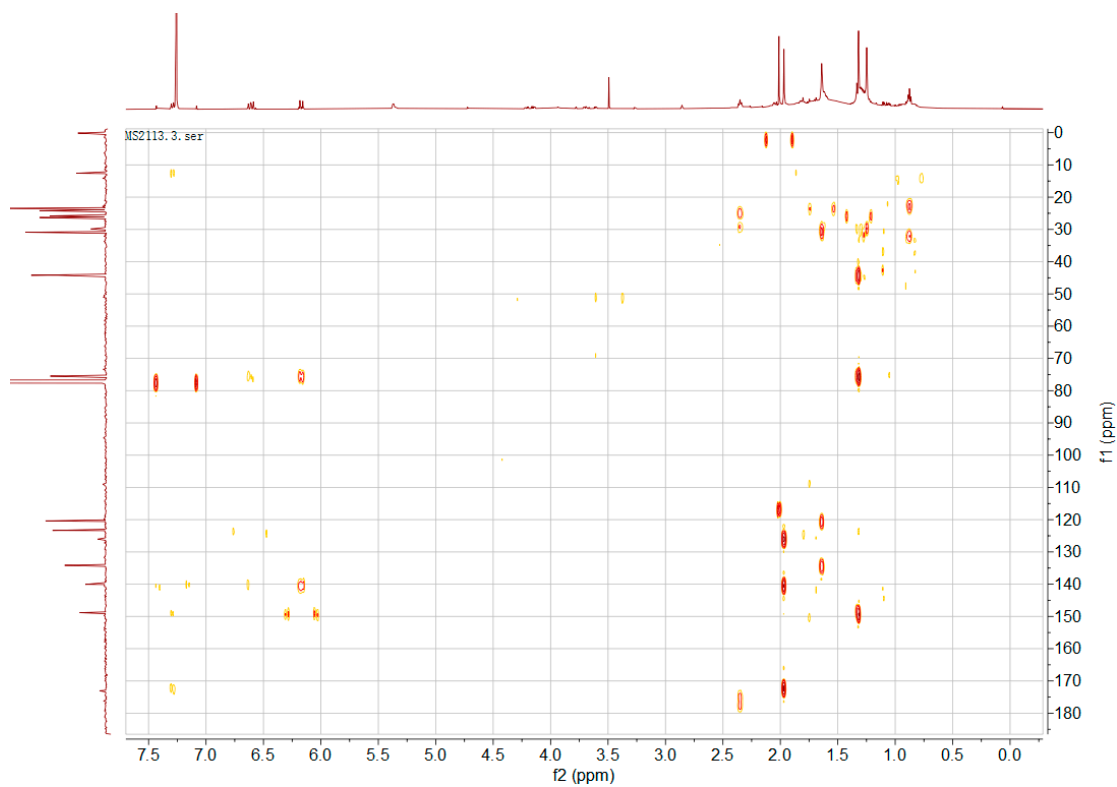

**Figure S16.** HMBC spectrum of elgonene N (**2**) in  $\text{CDCl}_3$

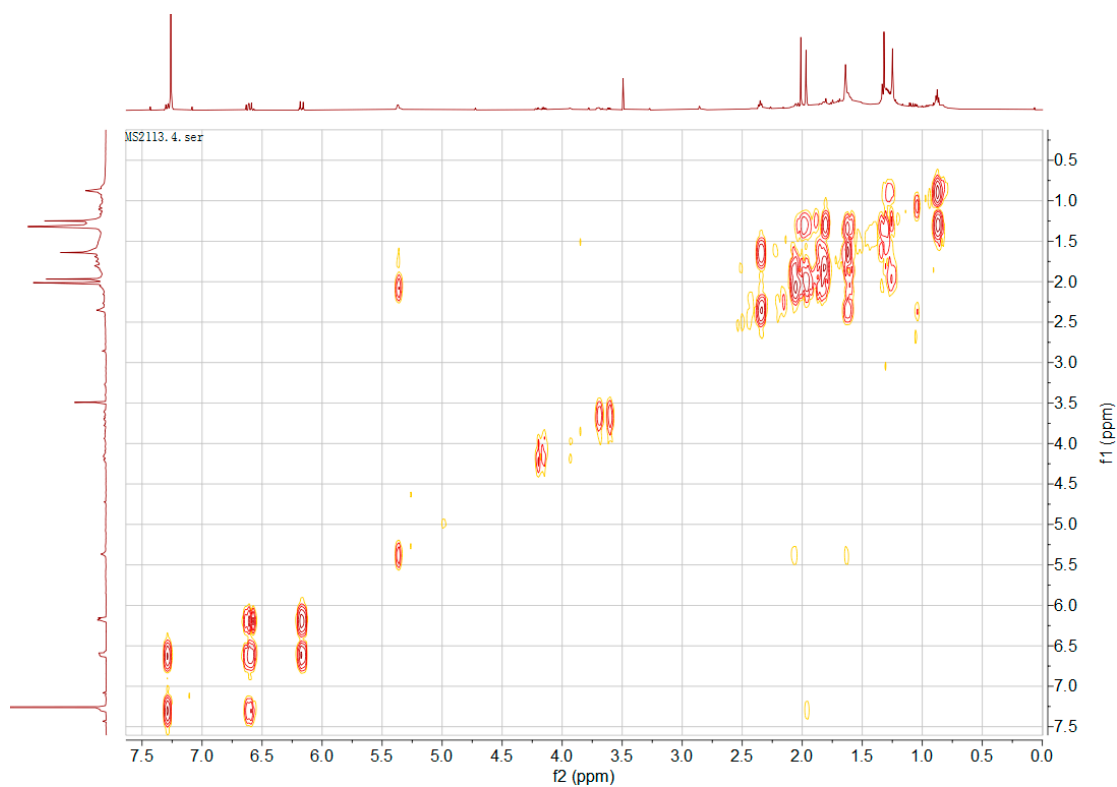

**Figure S17.**  $^1\text{H}$ - $^1\text{H}$  COSY spectrum of elgonene N (**2**) in  $\text{CDCl}_3$

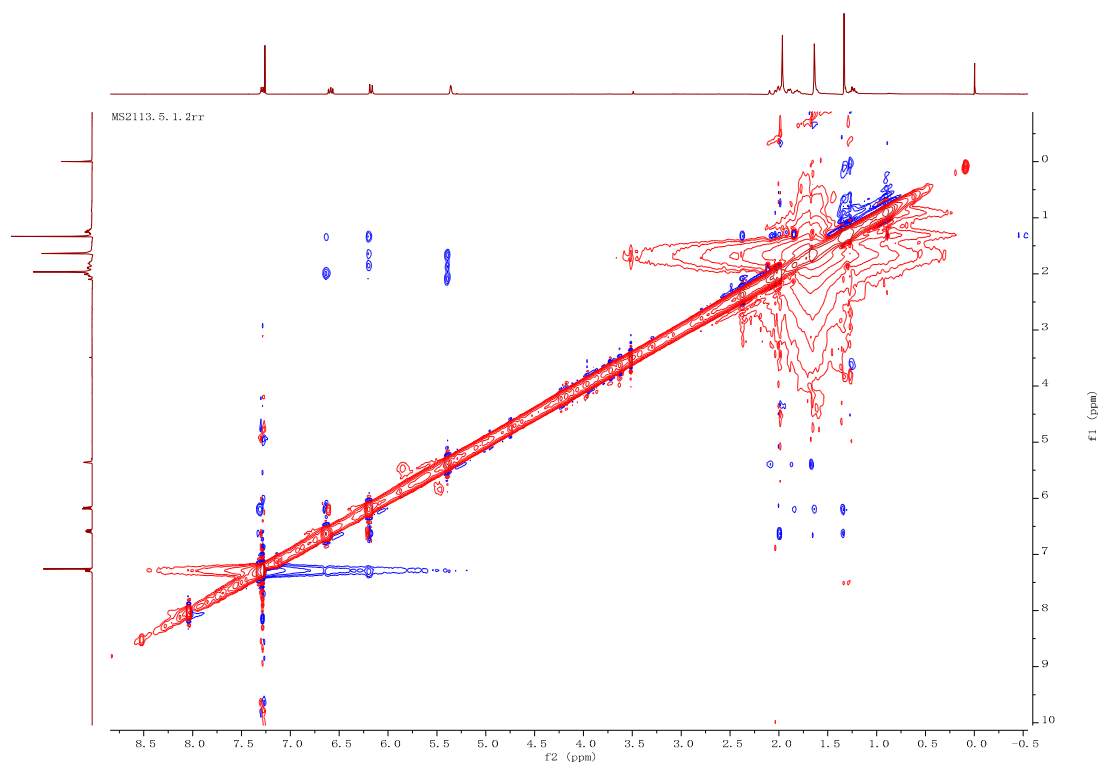

**Figure S18.** NOESY spectrum of elgonene N (**2**) in  $\text{CDCl}_3$

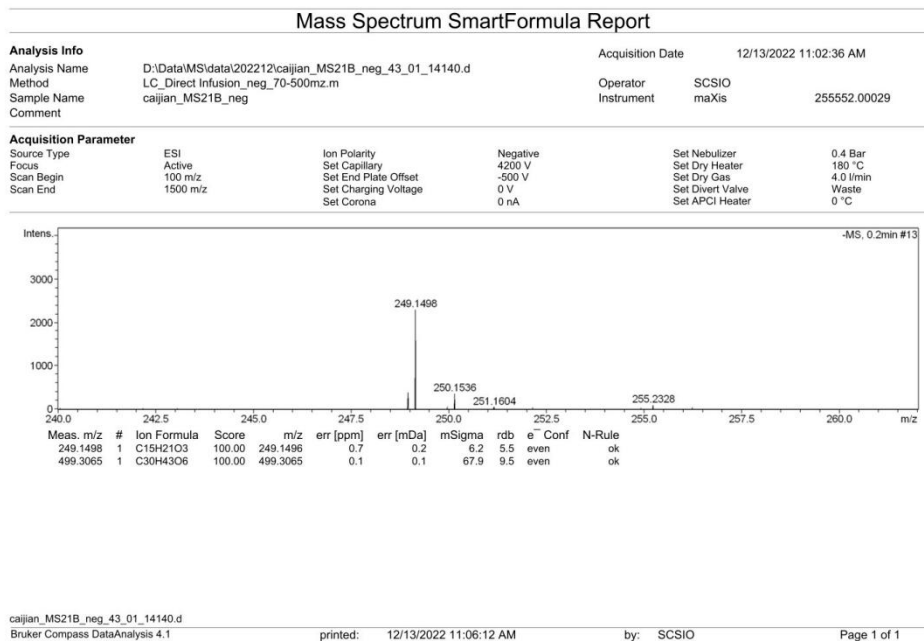

**Figure S19.** HRESIMS spectrum of elgonene N (2)

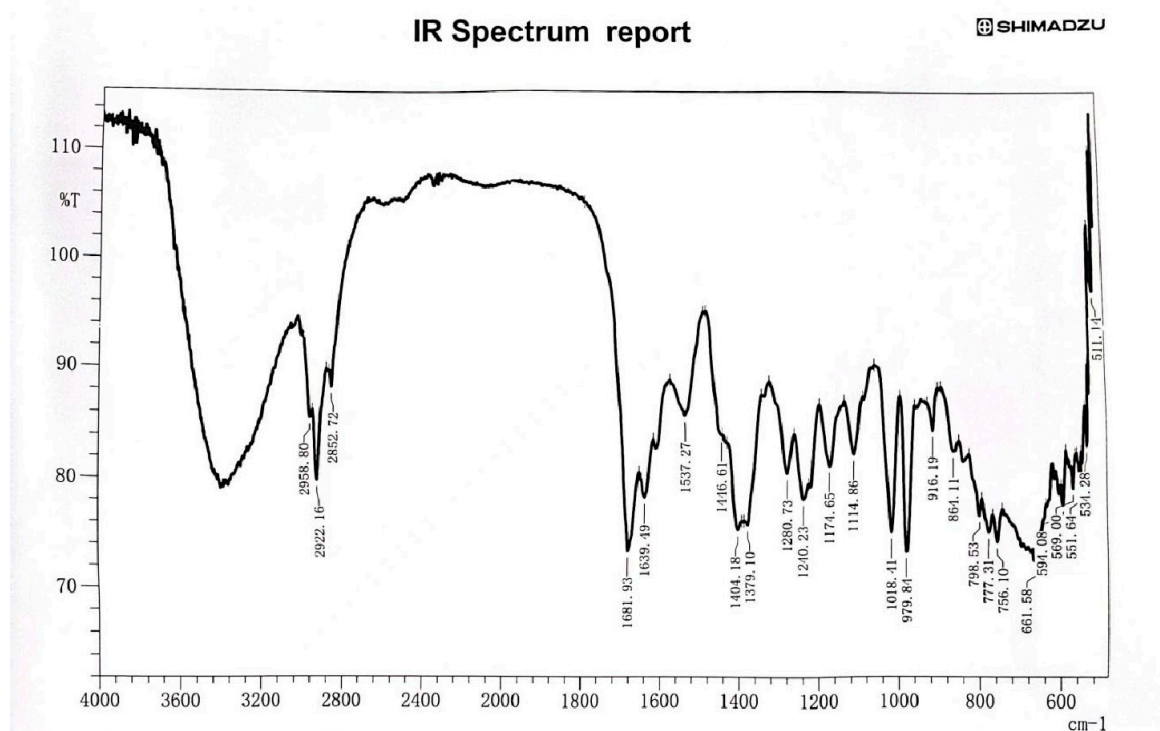

**Figure S20.** IR spectrum of elgonene N (2)



Method file : <untitled>  
Information : Default Method  
Data File : <untitled>

Overlaid Spectra:

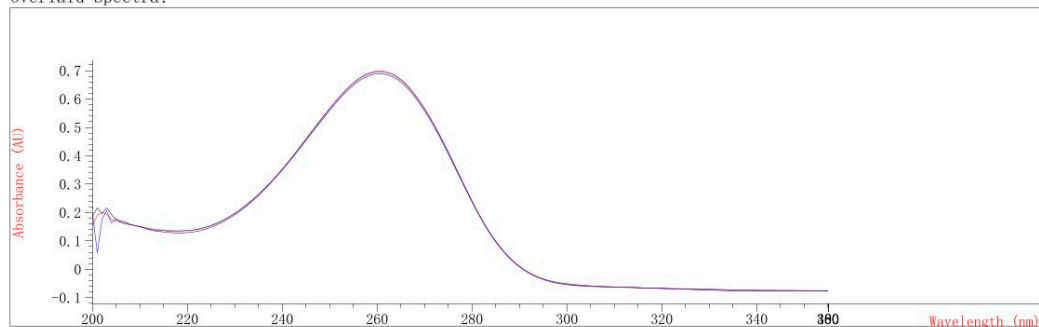

| # | Name | Abs<260nm> | # | Name | Abs<260nm> | # | Name | Abs<260nm> |
|---|------|------------|---|------|------------|---|------|------------|
| 1 |      | 0.68990    | 2 |      | 0.69920    | 3 |      | 0.69689    |

Report generated by : 1

Signature: .....

\*\*\* End Fixed Wavelength Report \*\*\*

**Figure S21.** UV spectrum of elgonene N (2) in MeOH

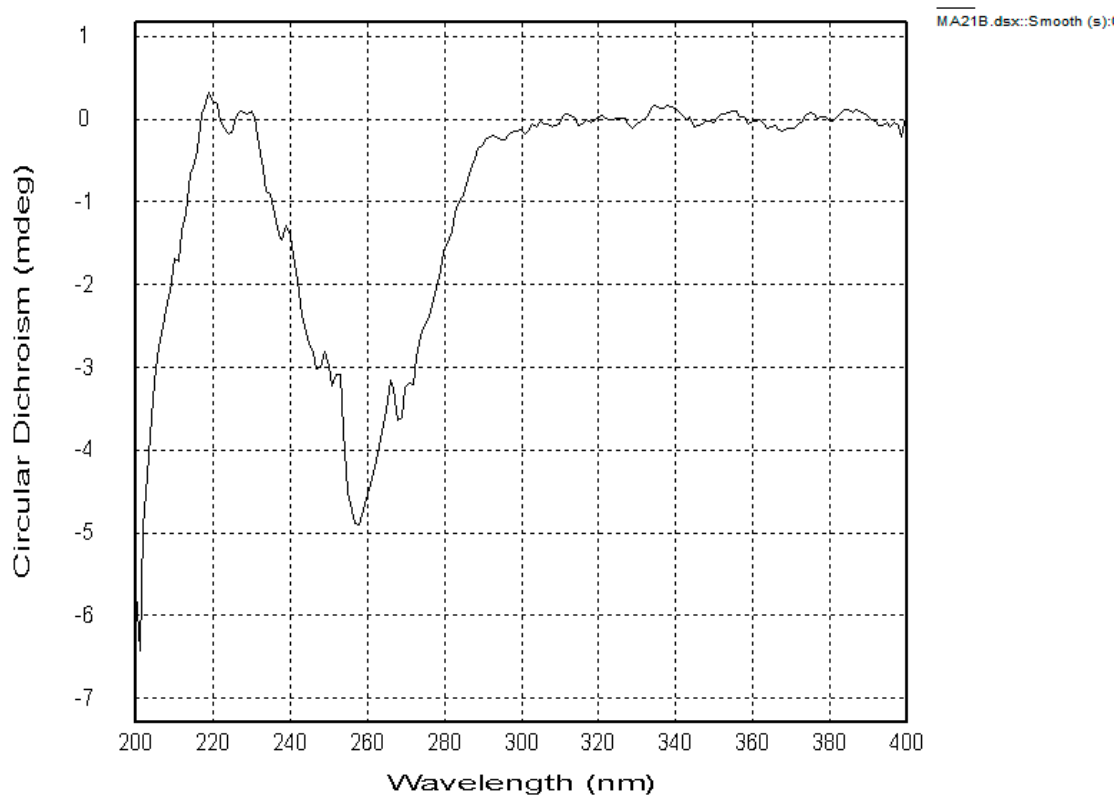

**Figure S22.** ECD spectrum of elgonene N (2) in MeOH

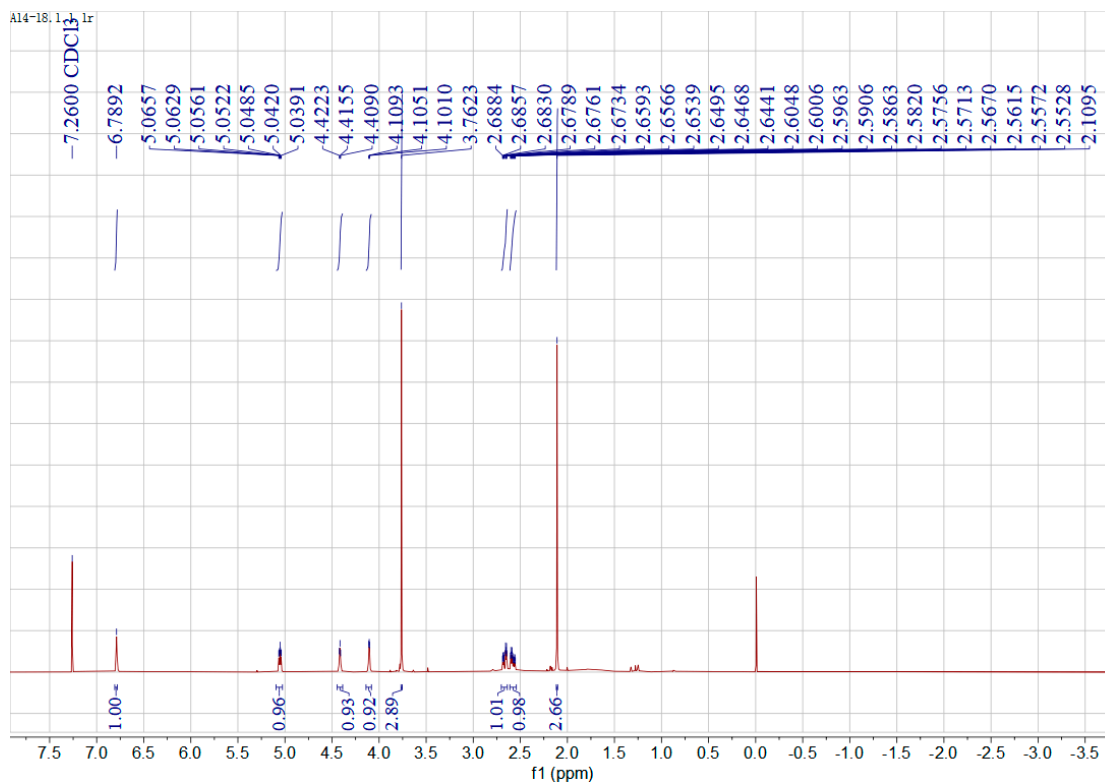

**Figure S23.**  $^1\text{H}$  NMR spectrum of compound **3** in  $\text{CDCl}_3$

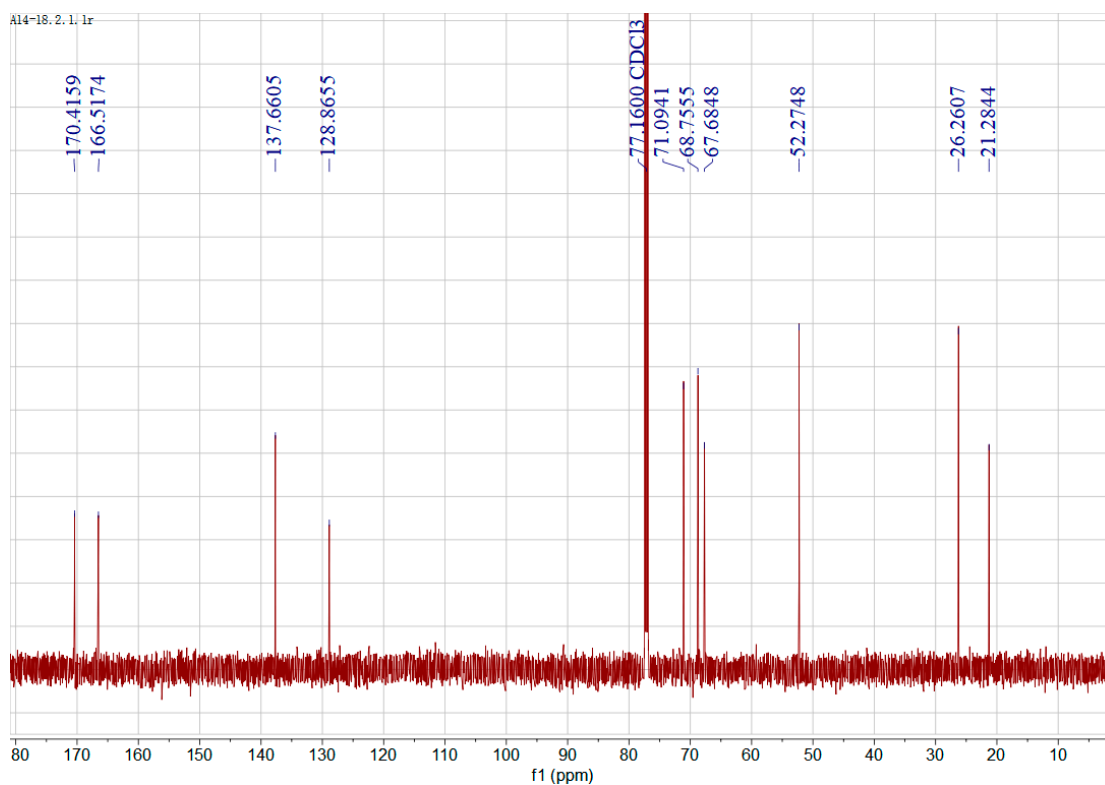

**Figure S24.**  $^{13}\text{C}$  NMR spectrum of compound **3** in  $\text{CDCl}_3$

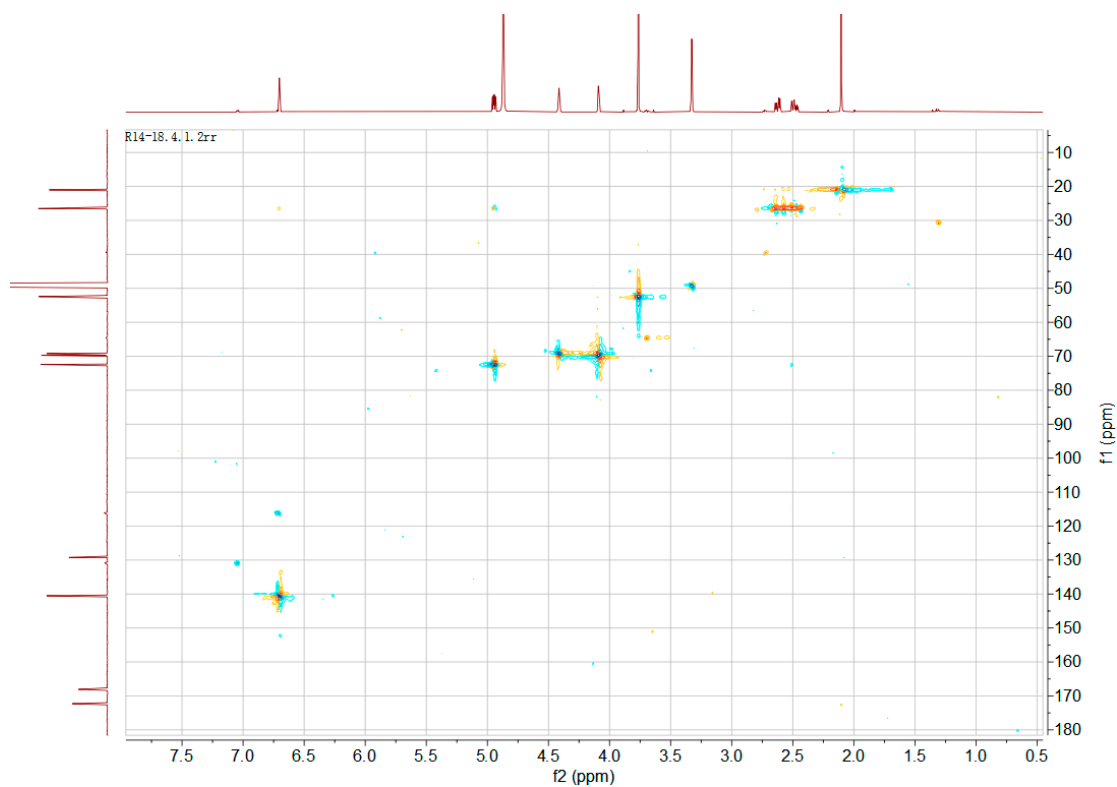

**Figure S25.** HSQC spectrum of compound **3** in CD<sub>3</sub>OD

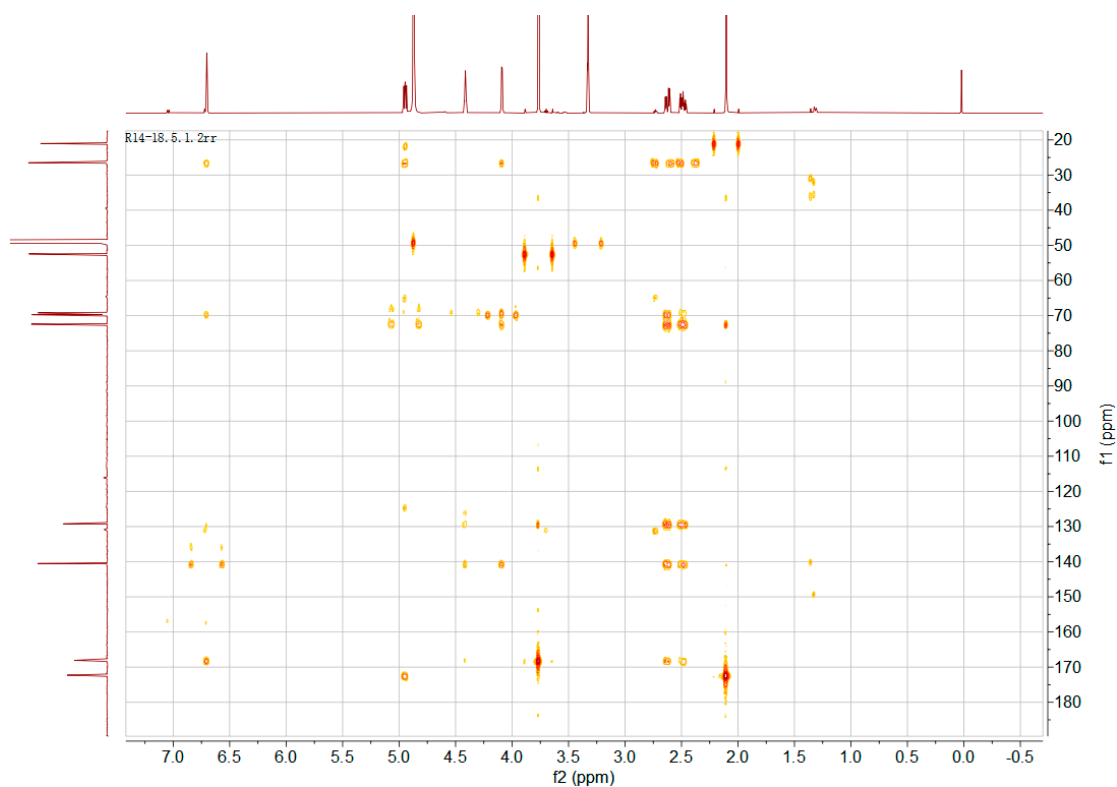

**Figure S26.** HMBC spectrum of compound **3** in CD<sub>3</sub>OD

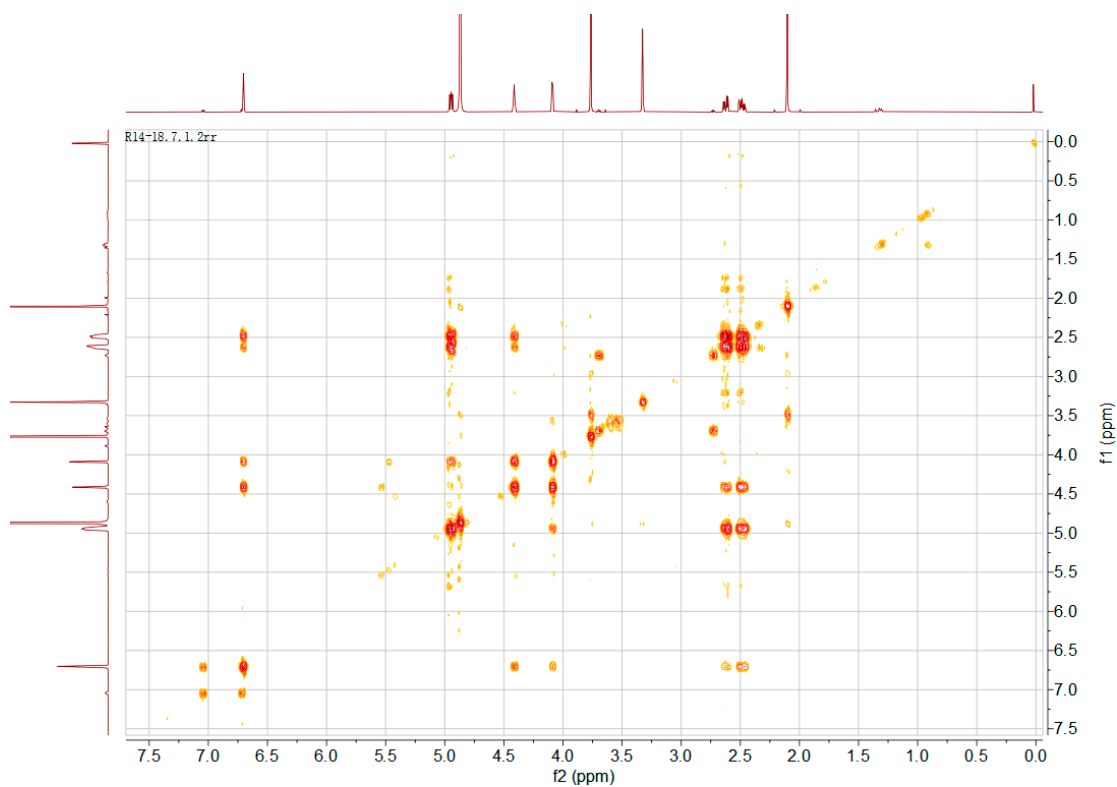

**Figure S27.**  $^1\text{H}$ - $^1\text{H}$  COSY spectrum of compound **3** in  $\text{CD}_3\text{OD}$

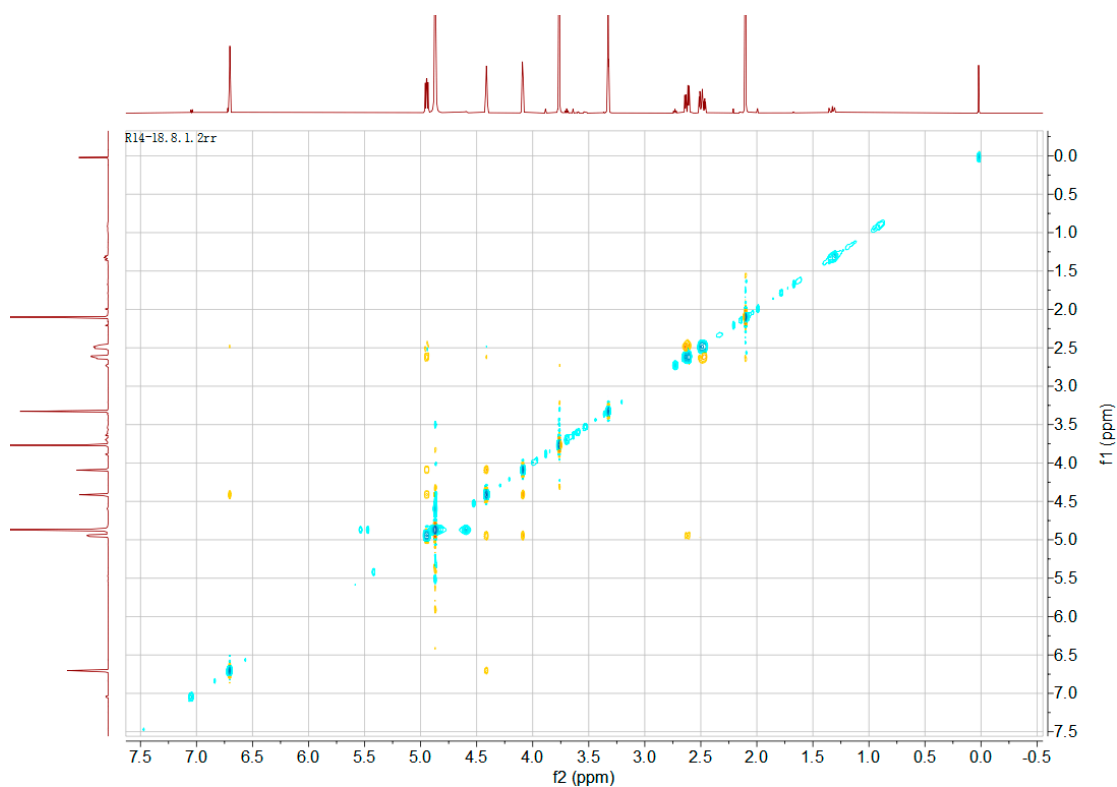

**Figure S28.** NOESY spectrum of compound **3** in  $\text{CD}_3\text{OD}$

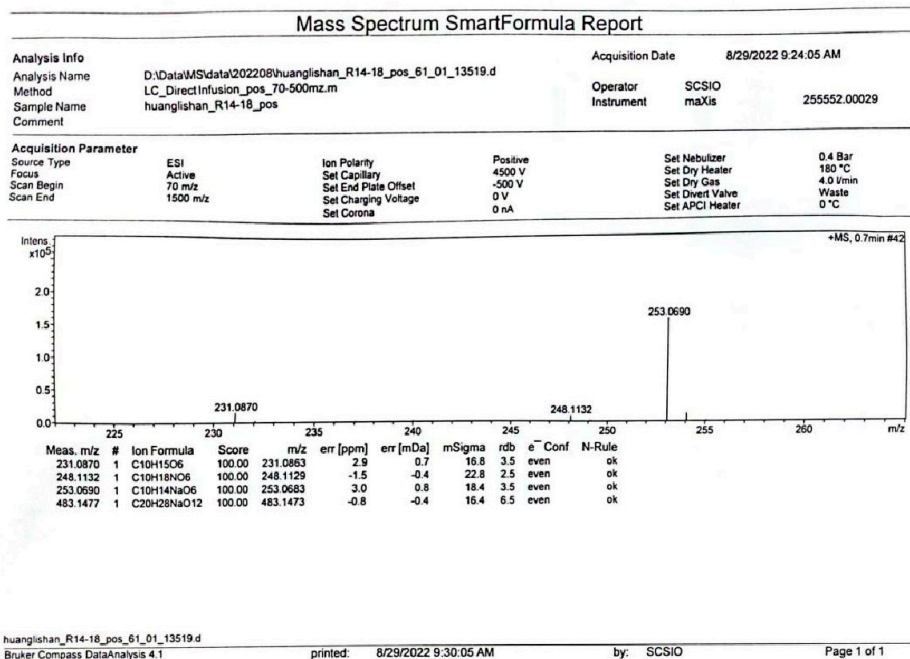

**Figure S29.** HRESIMS spectrum of compound **3**

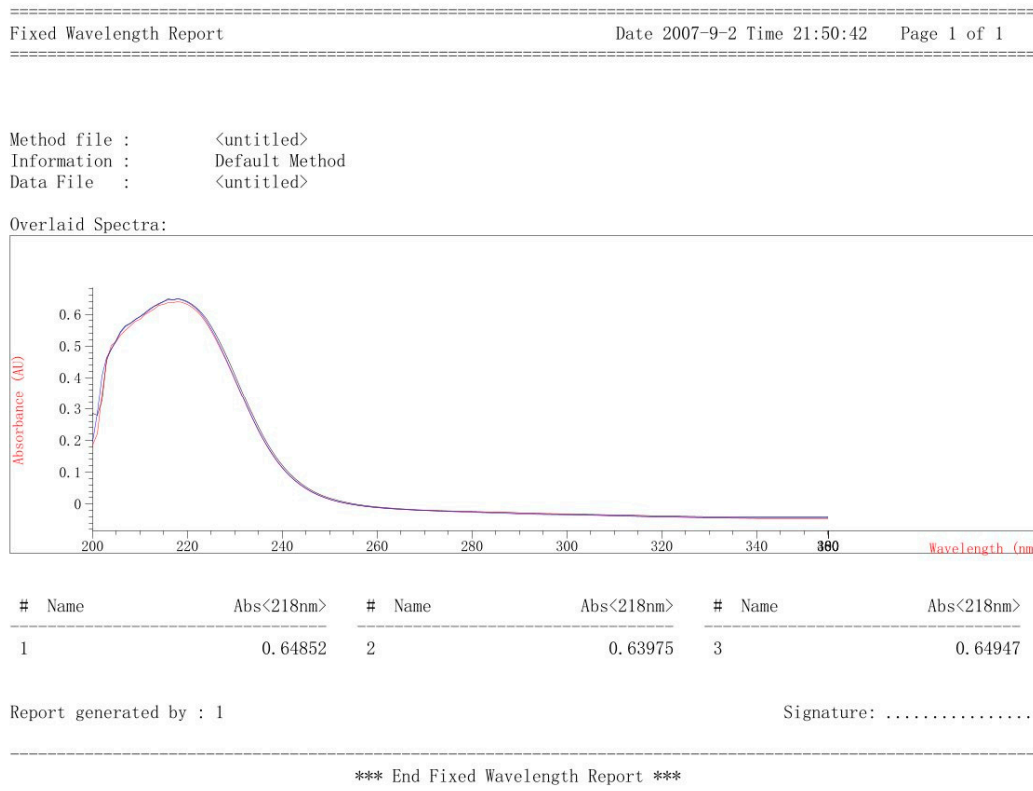

**Figure S30.** UV spectrum of compound **3** in MeOH

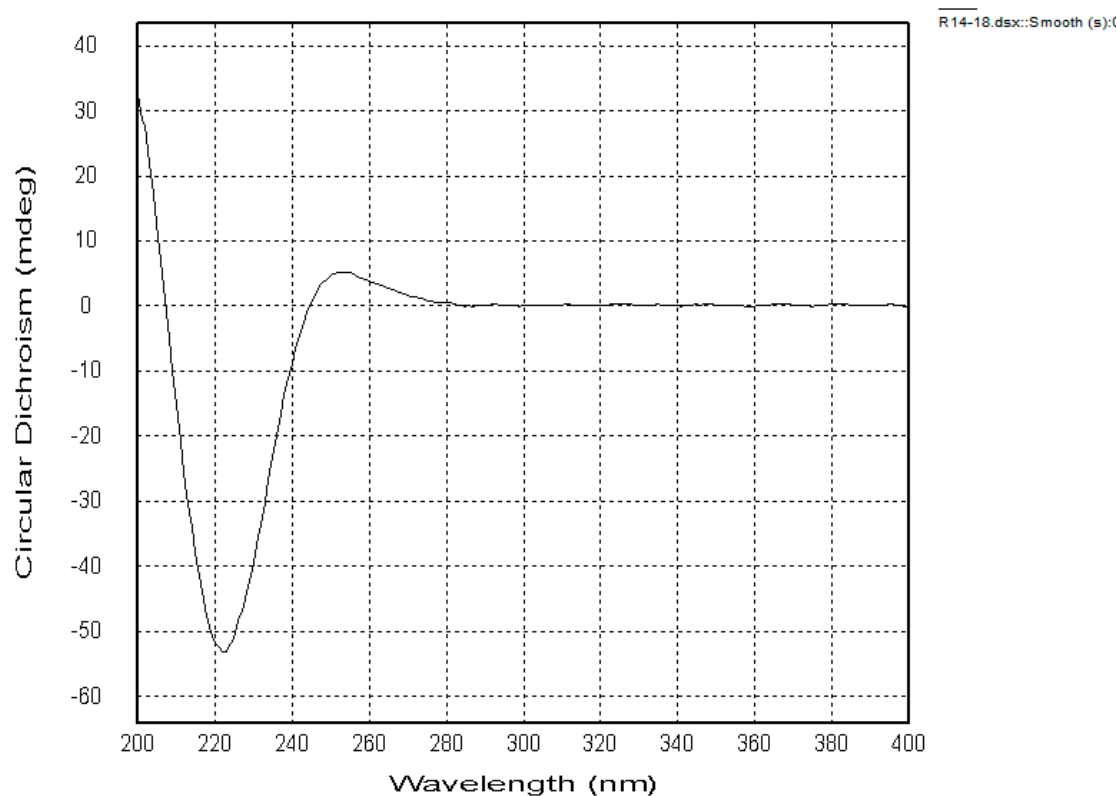

**Figure S31.** ECD spectrum of compound **3** in MeOH

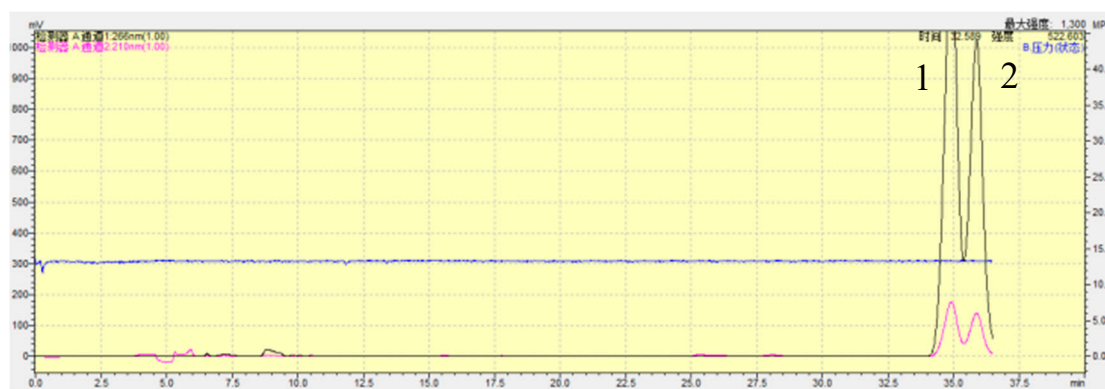

**Figure S32.** HPLC spectrum of compounds **1** and **2**

**Table S1.** Energies of **1/2** at B3LYP/6–311g (d, p) level.

| Configuration | Conformer                                                                           | E (Hartree)    | E (kcal/mol)      | Population |
|---------------|-------------------------------------------------------------------------------------|----------------|-------------------|------------|
| 6S, 7R-1/2    | 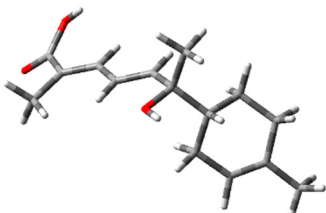 | -810.576929930 | -508645.129300374 | 6.35%      |

|                              |                                                                                     |                |                   |        |
|------------------------------|-------------------------------------------------------------------------------------|----------------|-------------------|--------|
| 6 <i>S</i> , 7 <i>R</i> -1/2 | 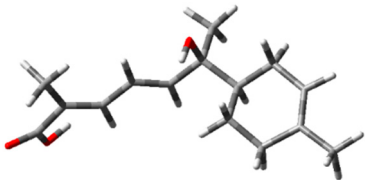    | -810.575624333 | -508644.310025201 | 1.59%  |
| 6 <i>S</i> , 7 <i>R</i> -1/2 |    | -810.576783344 | -508645.037316193 | 5.44%  |
| 6 <i>S</i> , 7 <i>R</i> -1/2 |    | -810.579226150 | -508646.570201386 | 72.32% |
| 6 <i>S</i> , 7 <i>R</i> -1/2 |    | -810.576684109 | -508644.975045239 | 4.90%  |
| 6 <i>S</i> , 7 <i>R</i> -1/2 |  | -810.577298275 | -508645.360440545 | 9.39%  |
| 6 <i>R</i> , 7 <i>S</i> -1/2 |  | -810.576929930 | -508645.129300374 | 6.36%  |
| 6 <i>R</i> , 7 <i>S</i> -1/2 |  | -810.575620754 | -508644.307779343 | 1.59%  |
| 6 <i>R</i> , 7 <i>S</i> -1/2 |  | -810.576783343 | -508645.037315566 | 5.44%  |

|            |                                                                                     |                |                   |        |
|------------|-------------------------------------------------------------------------------------|----------------|-------------------|--------|
| 6R, 7S-1/2 | 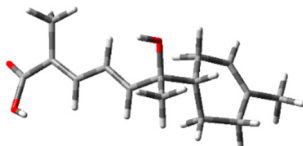    | -810.579226149 | -508646.570200759 | 72.34% |
| 6R, 7S-1/2 |    | -810.576679928 | -508644.972421619 | 4.88%  |
| 6R, 7S-1/2 |    | -810.577298273 | -508645.360439290 | 9.39%  |
| 6S, 7S-1/2 |    | -810.574393125 | -508643.537429869 | 1.12%  |
| 6S, 7S-1/2 |   | -810.578173993 | -508645.909962347 | 61.34% |
| 6S, 7S-1/2 |  | -810.576942782 | -508645.137365133 | 16.65% |
| 6S, 7S-1/2 |  | -810.576223625 | -508644.686086924 | 7.77%  |
| 6S, 7S-1/2 |  | -810.575957880 | -508644.519329279 | 5.87%  |
| 6S, 7S-1/2 |  | -810.576158272 | -508644.645077263 | 7.25%  |



6*R*, 7*R*-1/2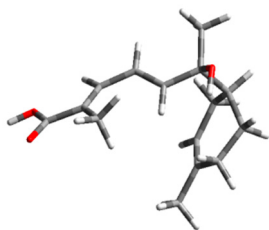

-810.576254660

-508644.705561697

5.91%

6*R*, 7*R*-1/2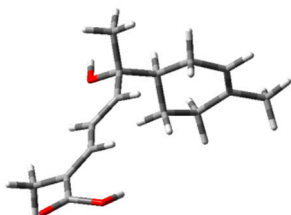

-810.574377462

-508643.527601180

0.81%

6*R*, 7*R*-1/2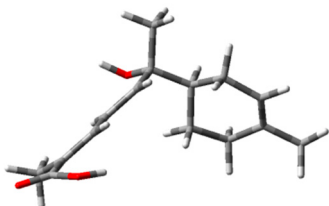

-810.576792747

-508645.043216670

10.44%

6*R*, 7*R*-1/2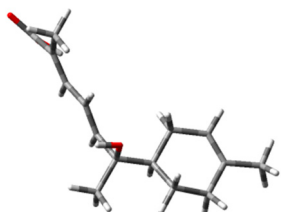

-810.577394560

-508645.420860346

19.76%

6*R*, 7*R*-1/2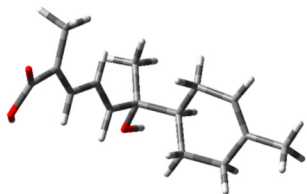

-810.576223626

-508644.686087551

5.72%

6*R*, 7*R*-1/2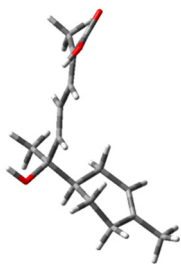

-810.578401055

-508646.052446023

57.37%

**Table S2.** Energies of **3** at B3LYP/6–311g (d, p) level.

| Configuration                           | Conformer | E (Hartree)    | E (kcal/mol)      | Population |
|-----------------------------------------|-----------|----------------|-------------------|------------|
| 3 <i>R</i> , 4 <i>R</i> , 5 <i>S</i> -3 |           | -840.919556213 | -527685.430719220 | 50.67%     |

|                                         |                                                                                     |                |                   |        |
|-----------------------------------------|-------------------------------------------------------------------------------------|----------------|-------------------|--------|
| 3 <i>R</i> , 4 <i>R</i> , 5 <i>S</i> -3 | 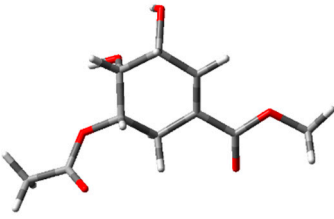    | -840.919385679 | -527685.323707429 | 42.29% |
| 3 <i>R</i> , 4 <i>R</i> , 5 <i>S</i> -3 |    | -840.915512148 | -527682.893027991 | 0.70%  |
| 3 <i>R</i> , 4 <i>R</i> , 5 <i>S</i> -3 |    | -840.917422155 | -527684.091576484 | 5.29%  |
| 3 <i>R</i> , 4 <i>R</i> , 5 <i>S</i> -3 |    | -840.915902521 | -527683.137990953 | 1.06%  |
| 3 <i>S</i> , 4 <i>S</i> , 5 <i>R</i> -3 |   | -840.919556213 | -527685.430719220 | 50.67% |
| 3 <i>S</i> , 4 <i>S</i> , 5 <i>R</i> -3 |  | -840.919385679 | -527685.323707429 | 42.29% |
| 3 <i>S</i> , 4 <i>S</i> , 5 <i>R</i> -3 |  | -840.915512148 | -527682.893027991 | 0.70%  |
| 3 <i>S</i> , 4 <i>S</i> , 5 <i>R</i> -3 |  | -840.917422155 | -527684.091576484 | 5.29%  |

3*S*, 4*S*, 5*R*-3

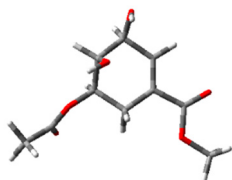

-840.915902522

-527683.137991580

1.06%

---
